# Supplementary material for: Breath-Hold-Triggered BOLD fMRI in Drug-Resistant Nonlesional Focal Epilepsy—A Pilot Study
Source: Springer Nature journal article supplement (doi:10.1007/s00062-023-01363-2), 2023-12-11

# Breath-hold-triggered BOLD fMRI in drug-resistant non-lesional focal epilepsy – a pilot study.

## Supplementary Information

Representative interictal and ictal EEG recordings of the study participants. Traces are shown as longitudinal bipolar and/or common average referential montages with frequency filters of LFF 1 Hz and HFF 70 Hz, no notch filter, timebase 30 mm/s, and sensitivity  $7\mu\text{v}/\text{mm}$ , unless stated otherwise

1

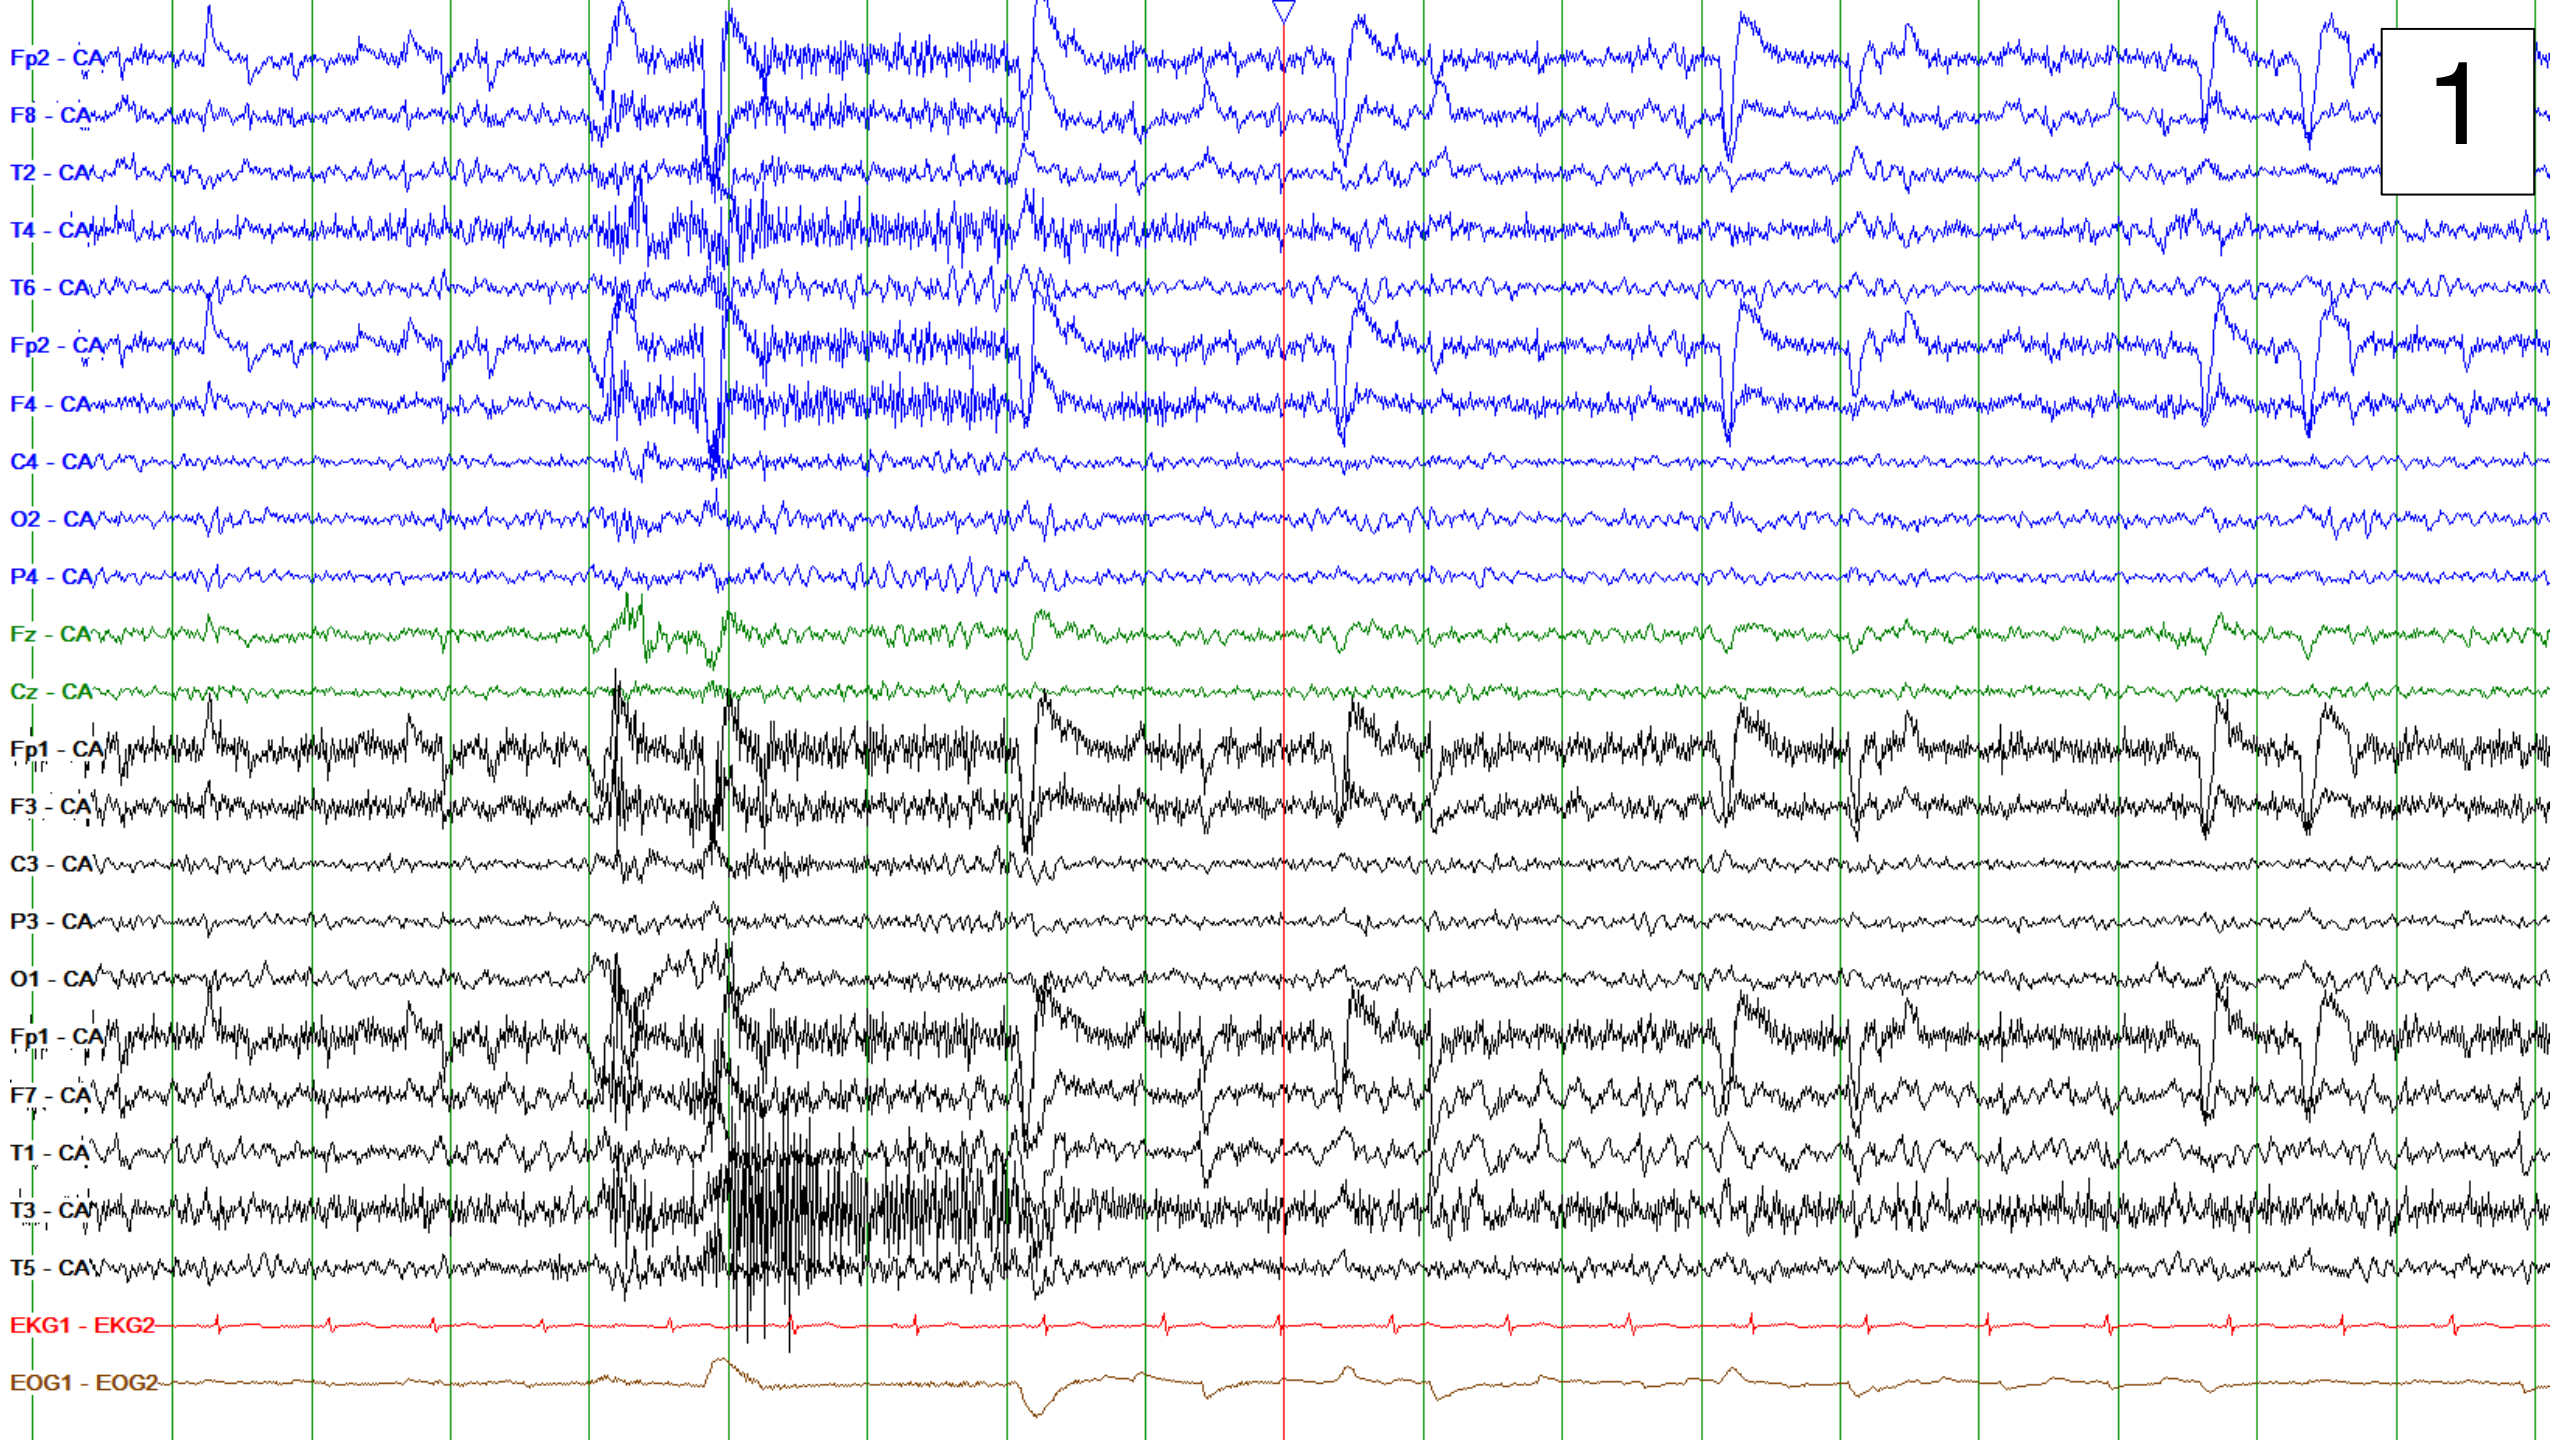

2

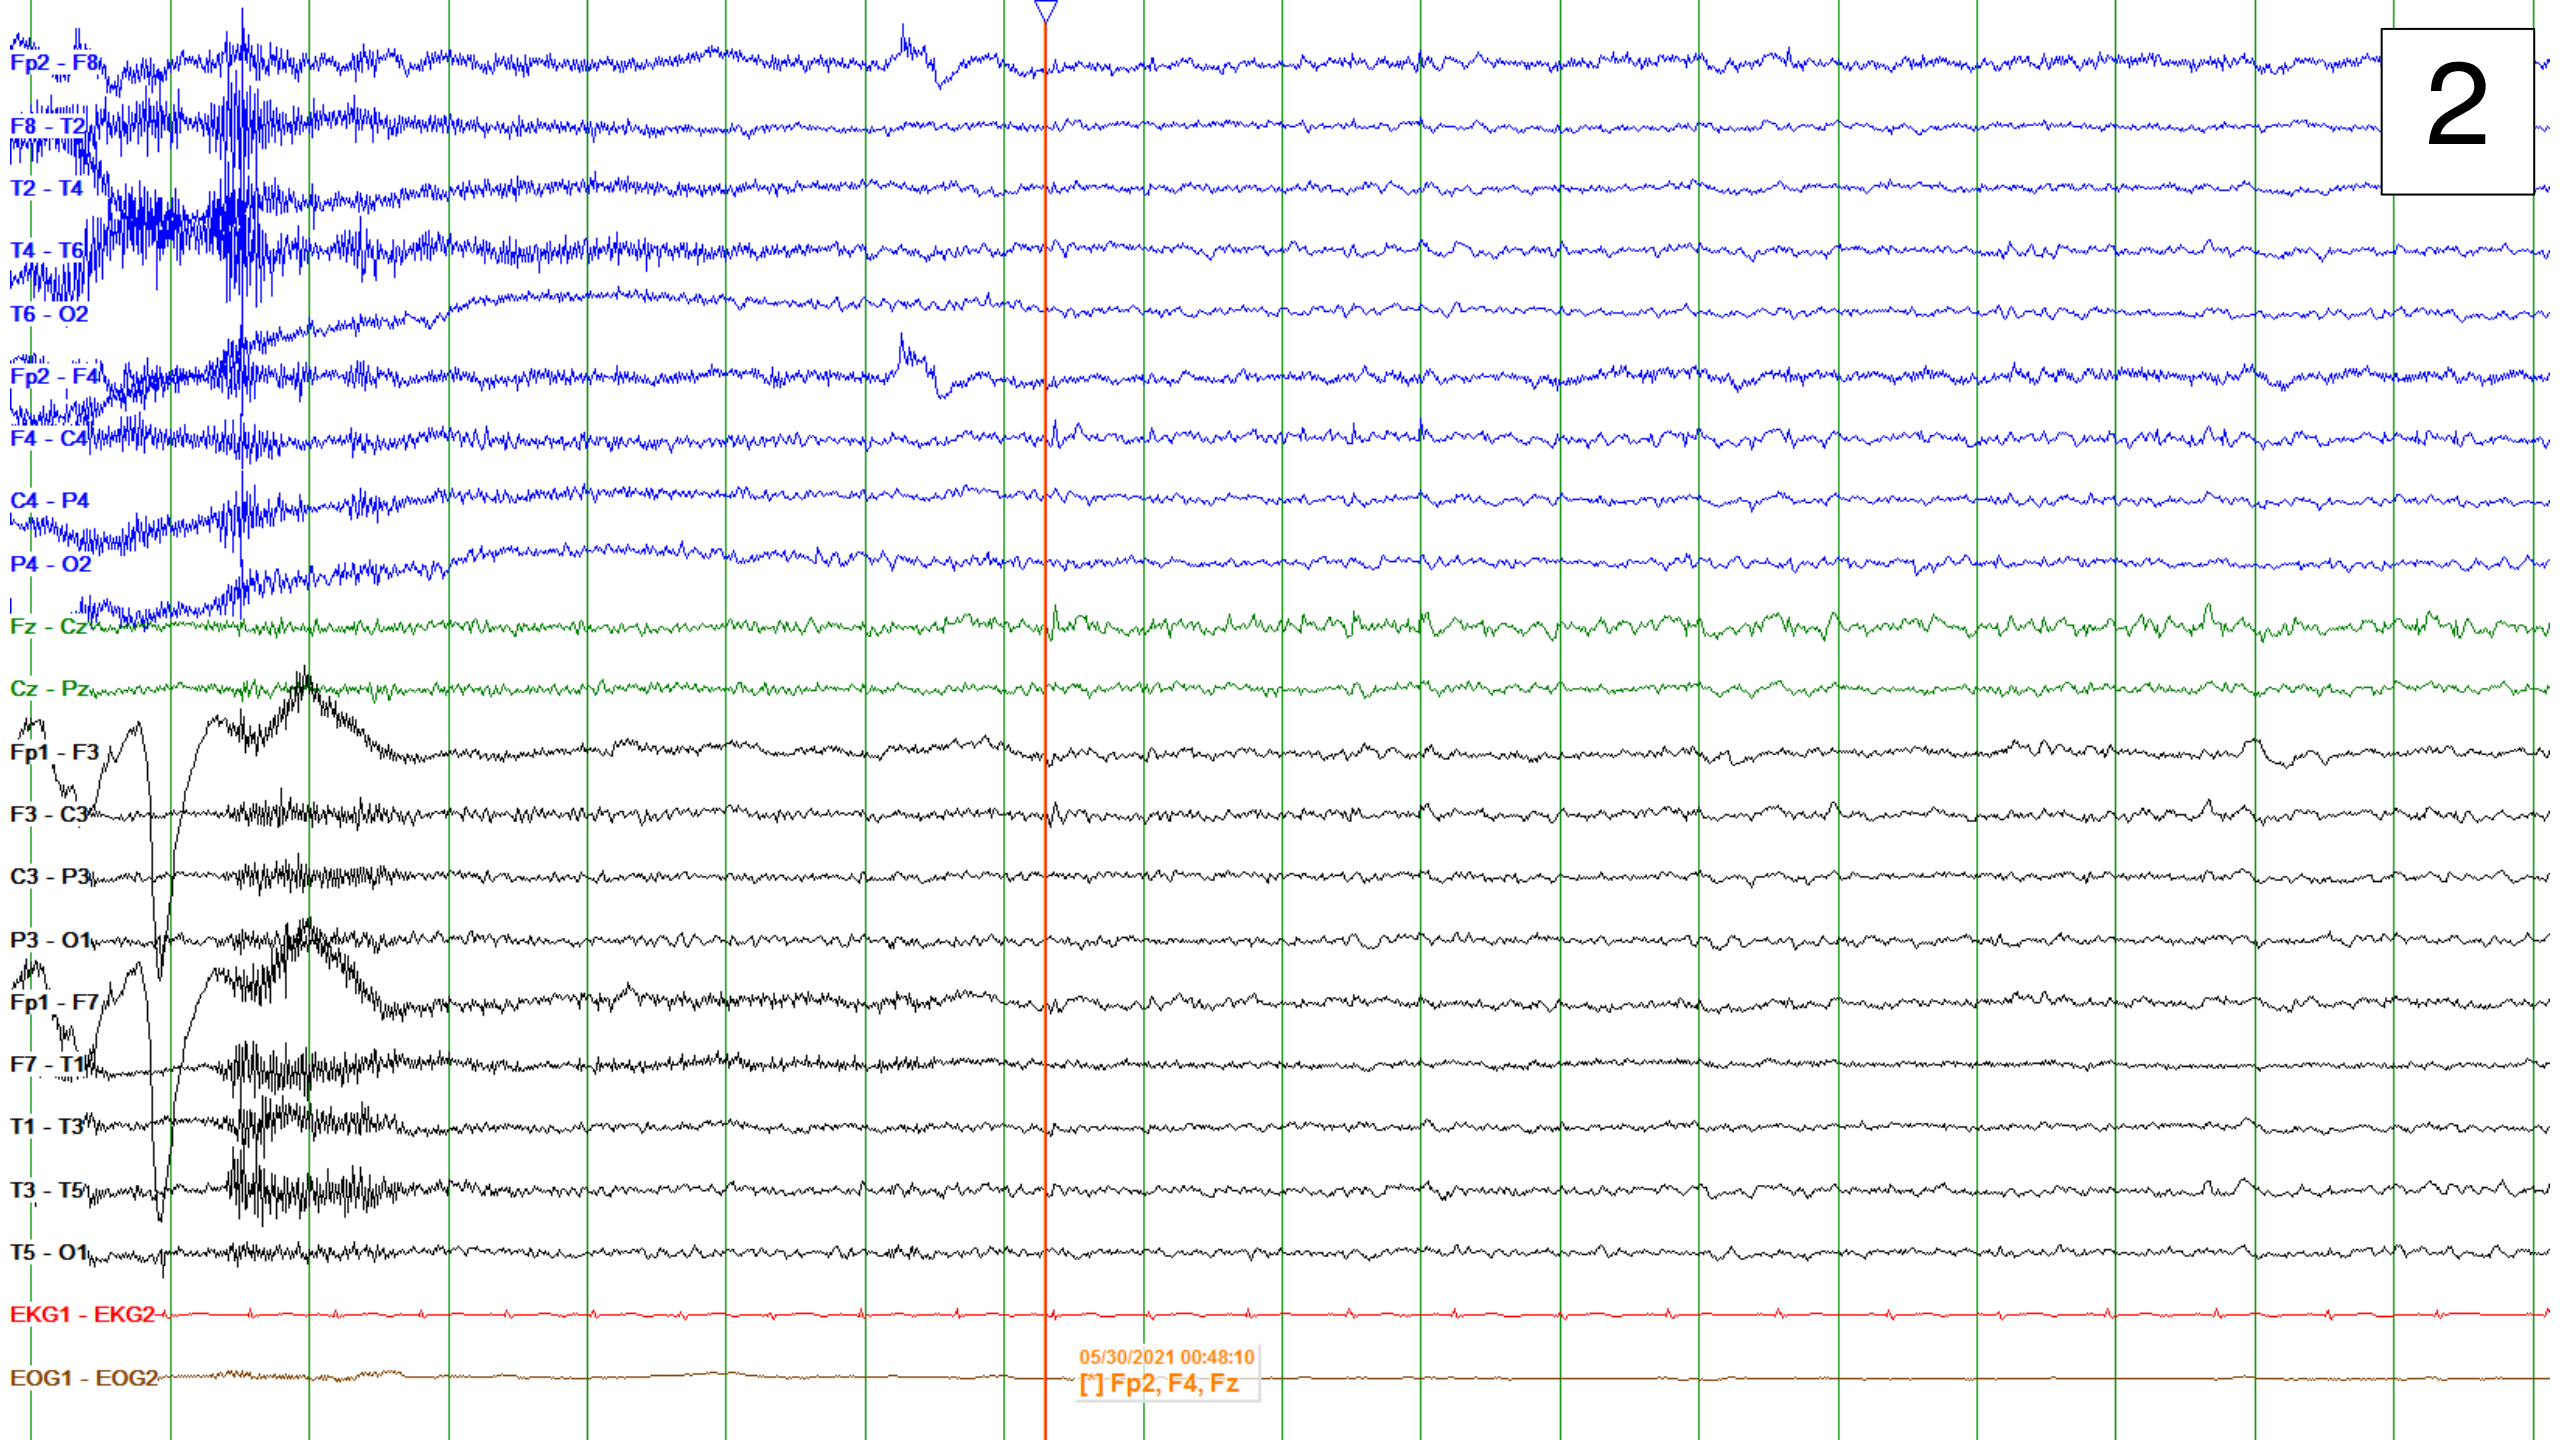

2

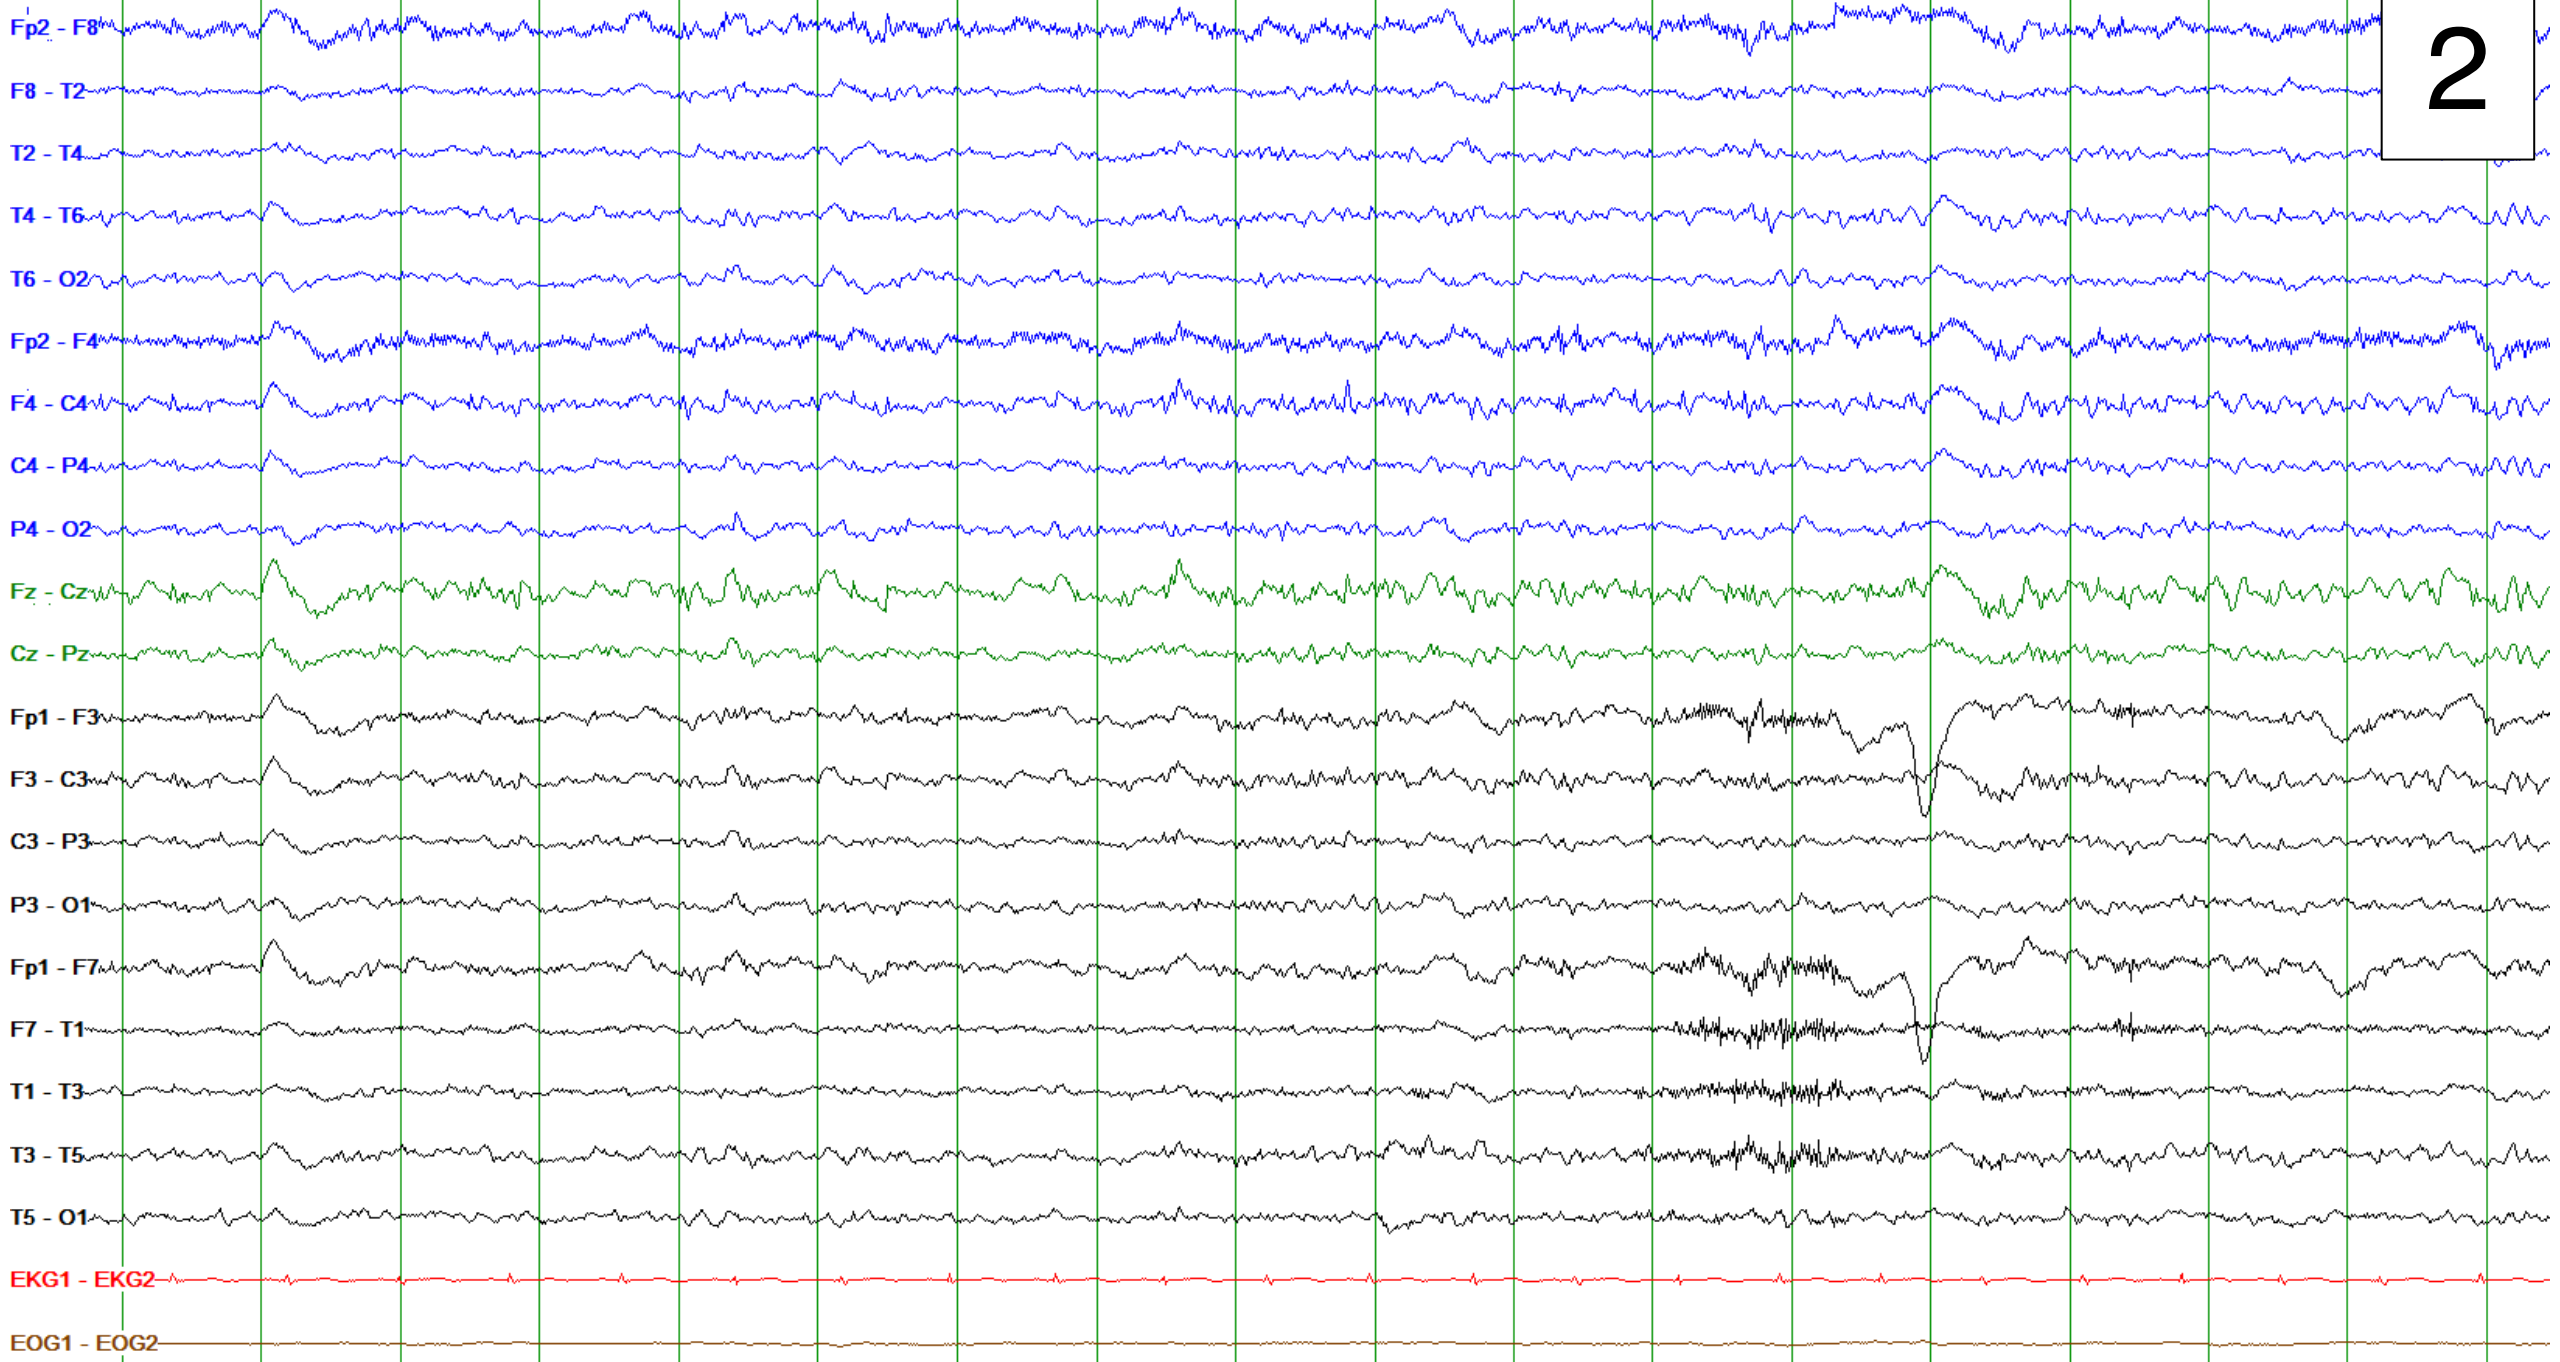

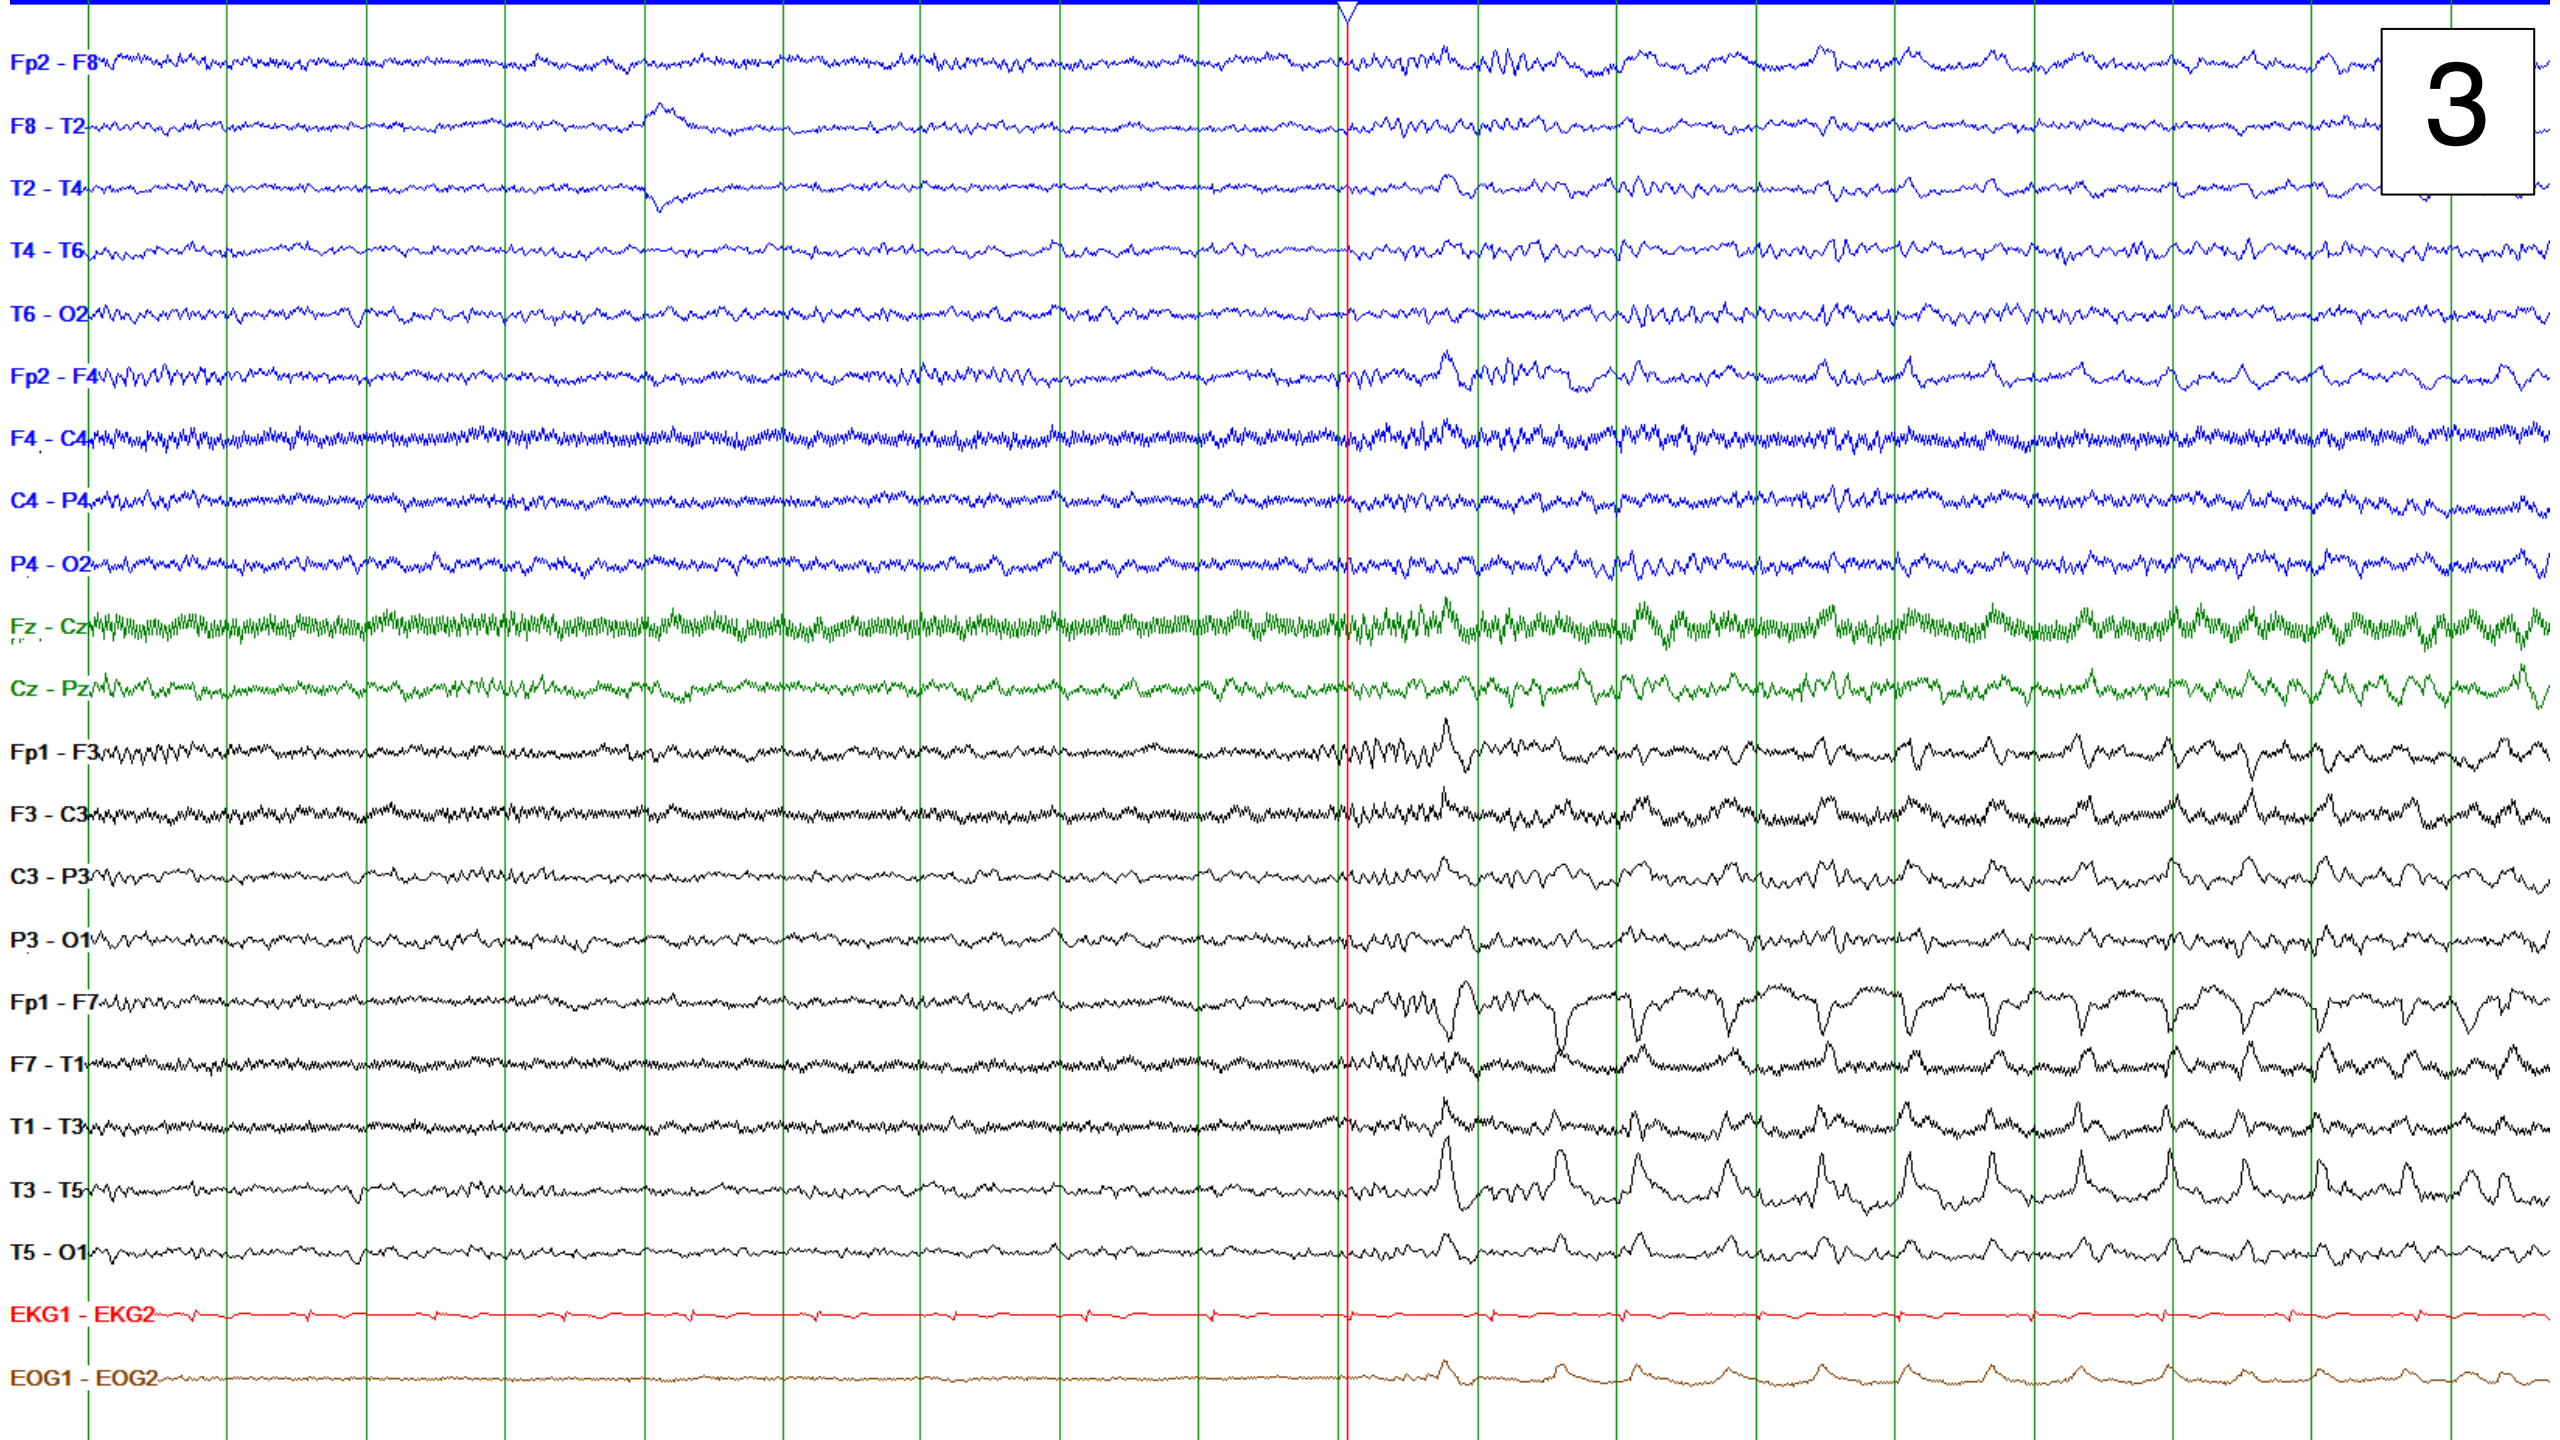



3

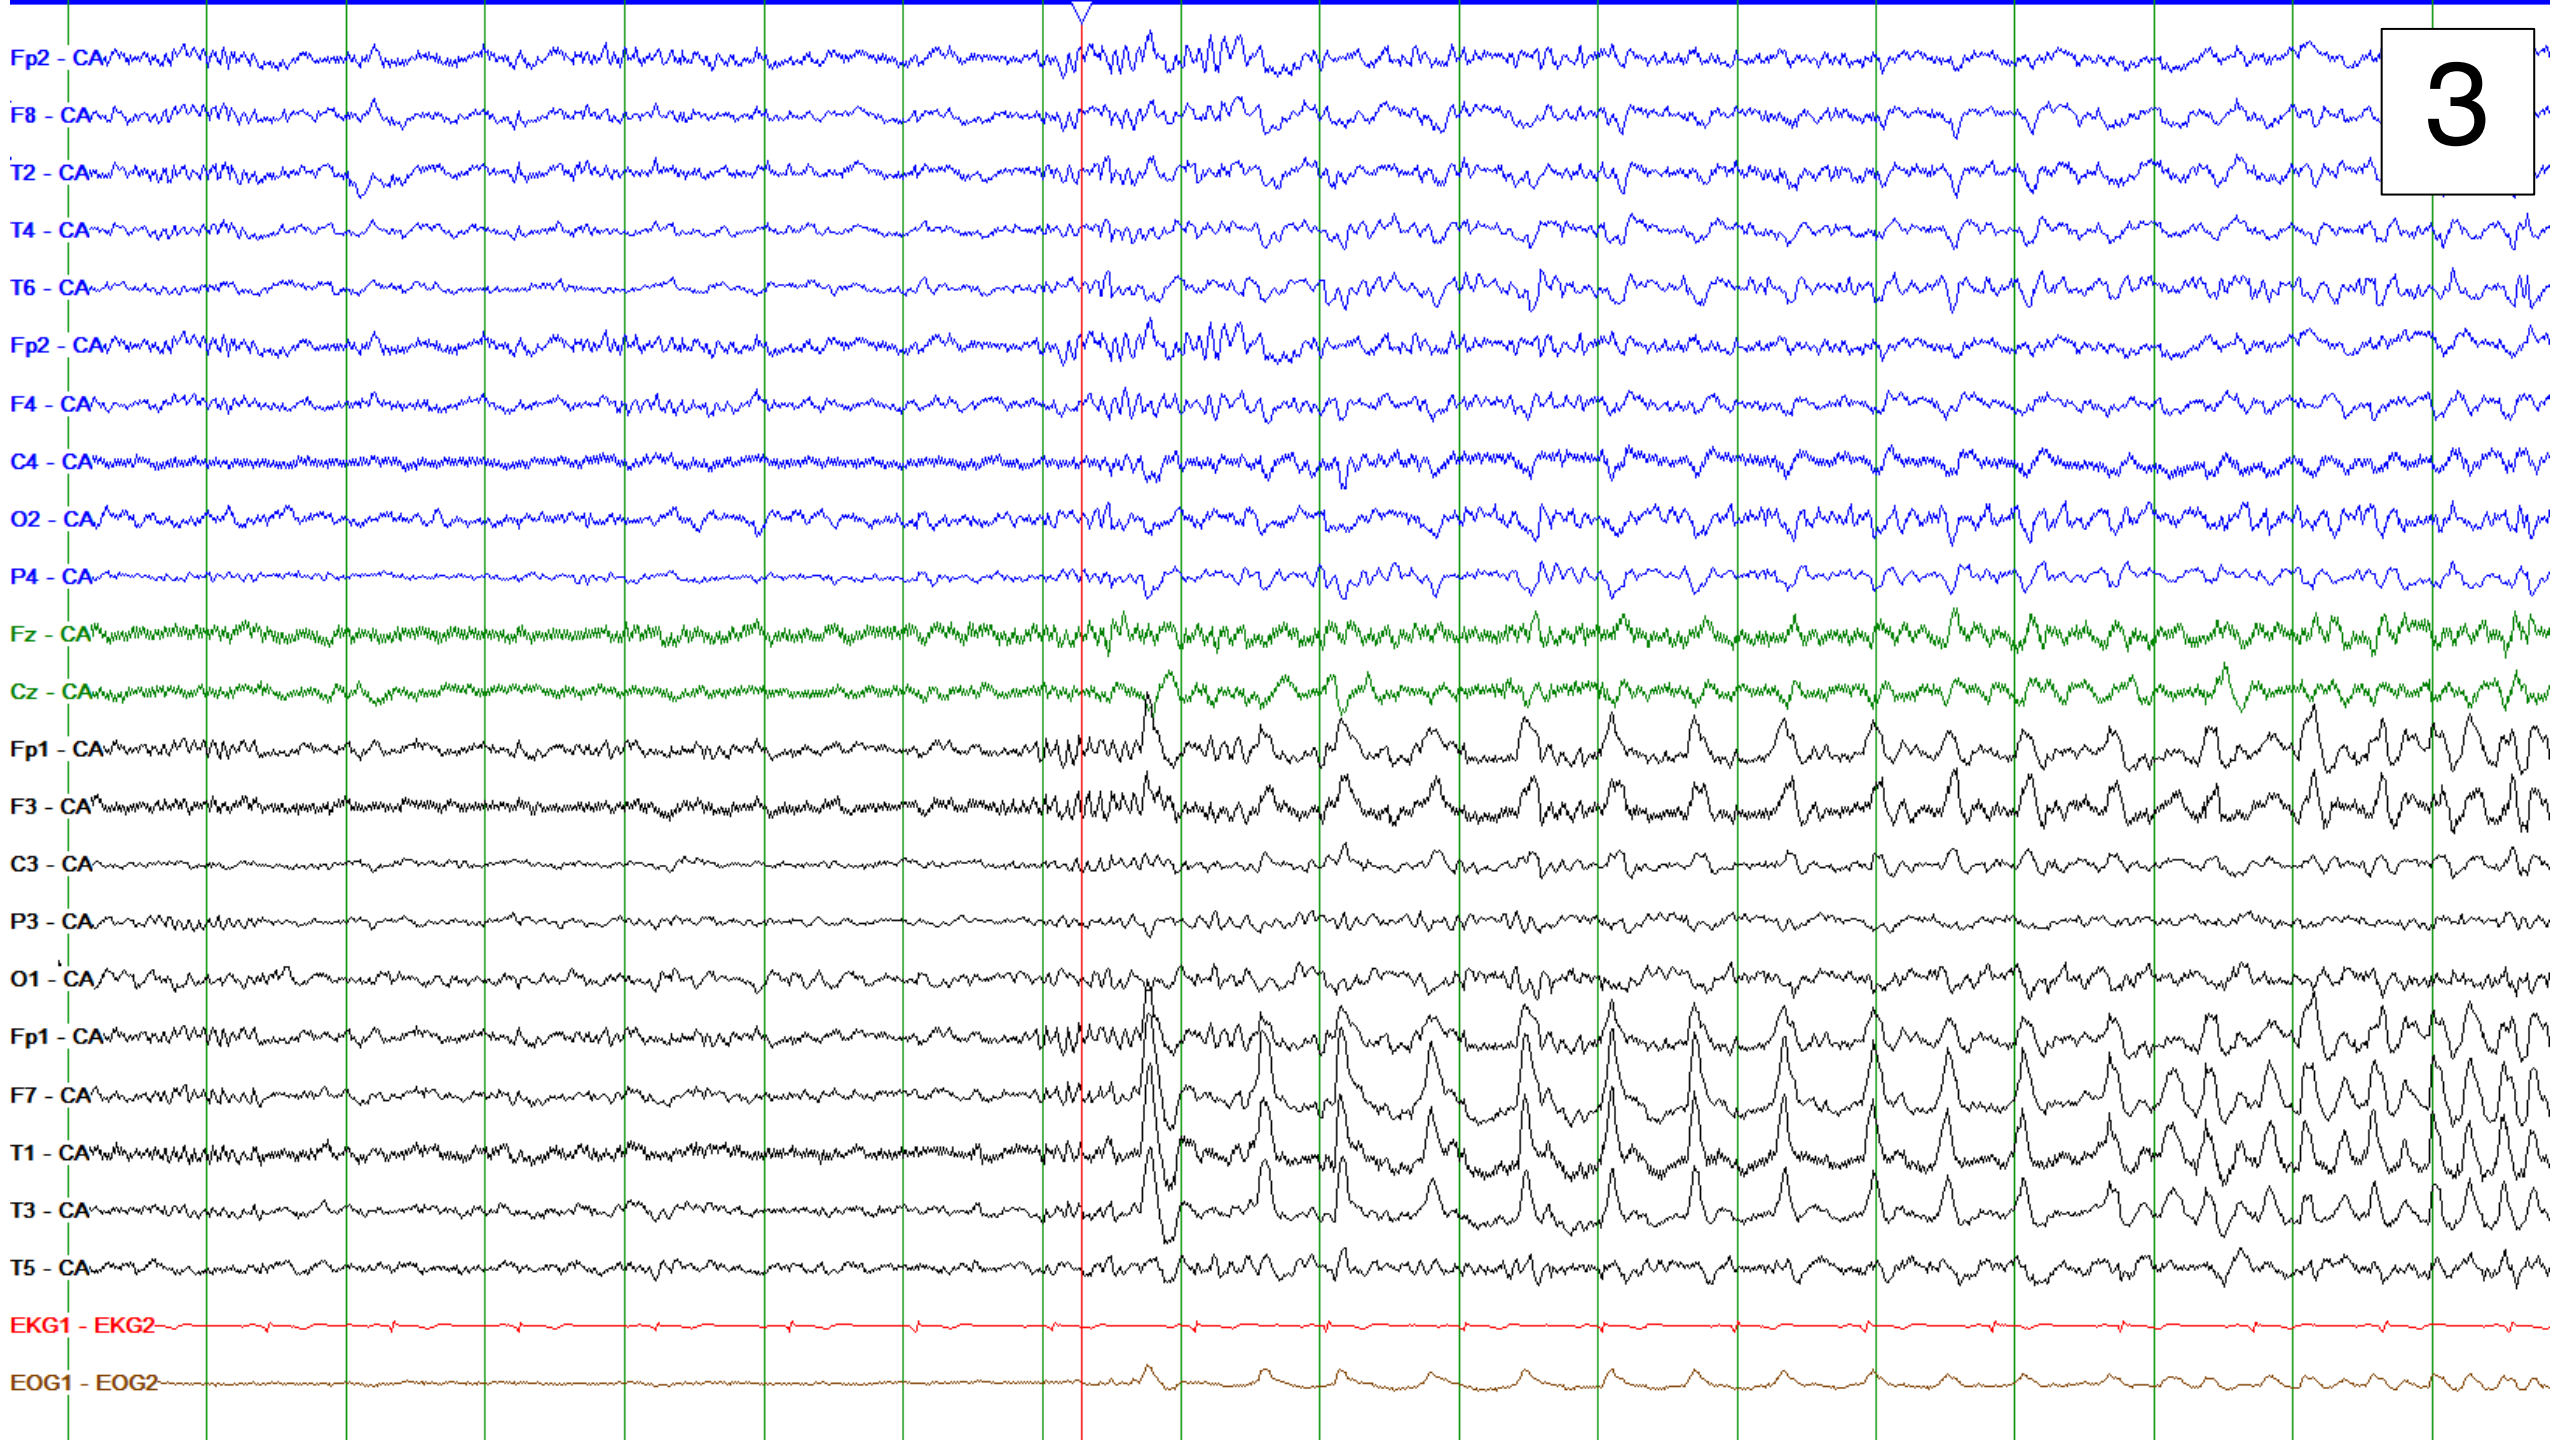

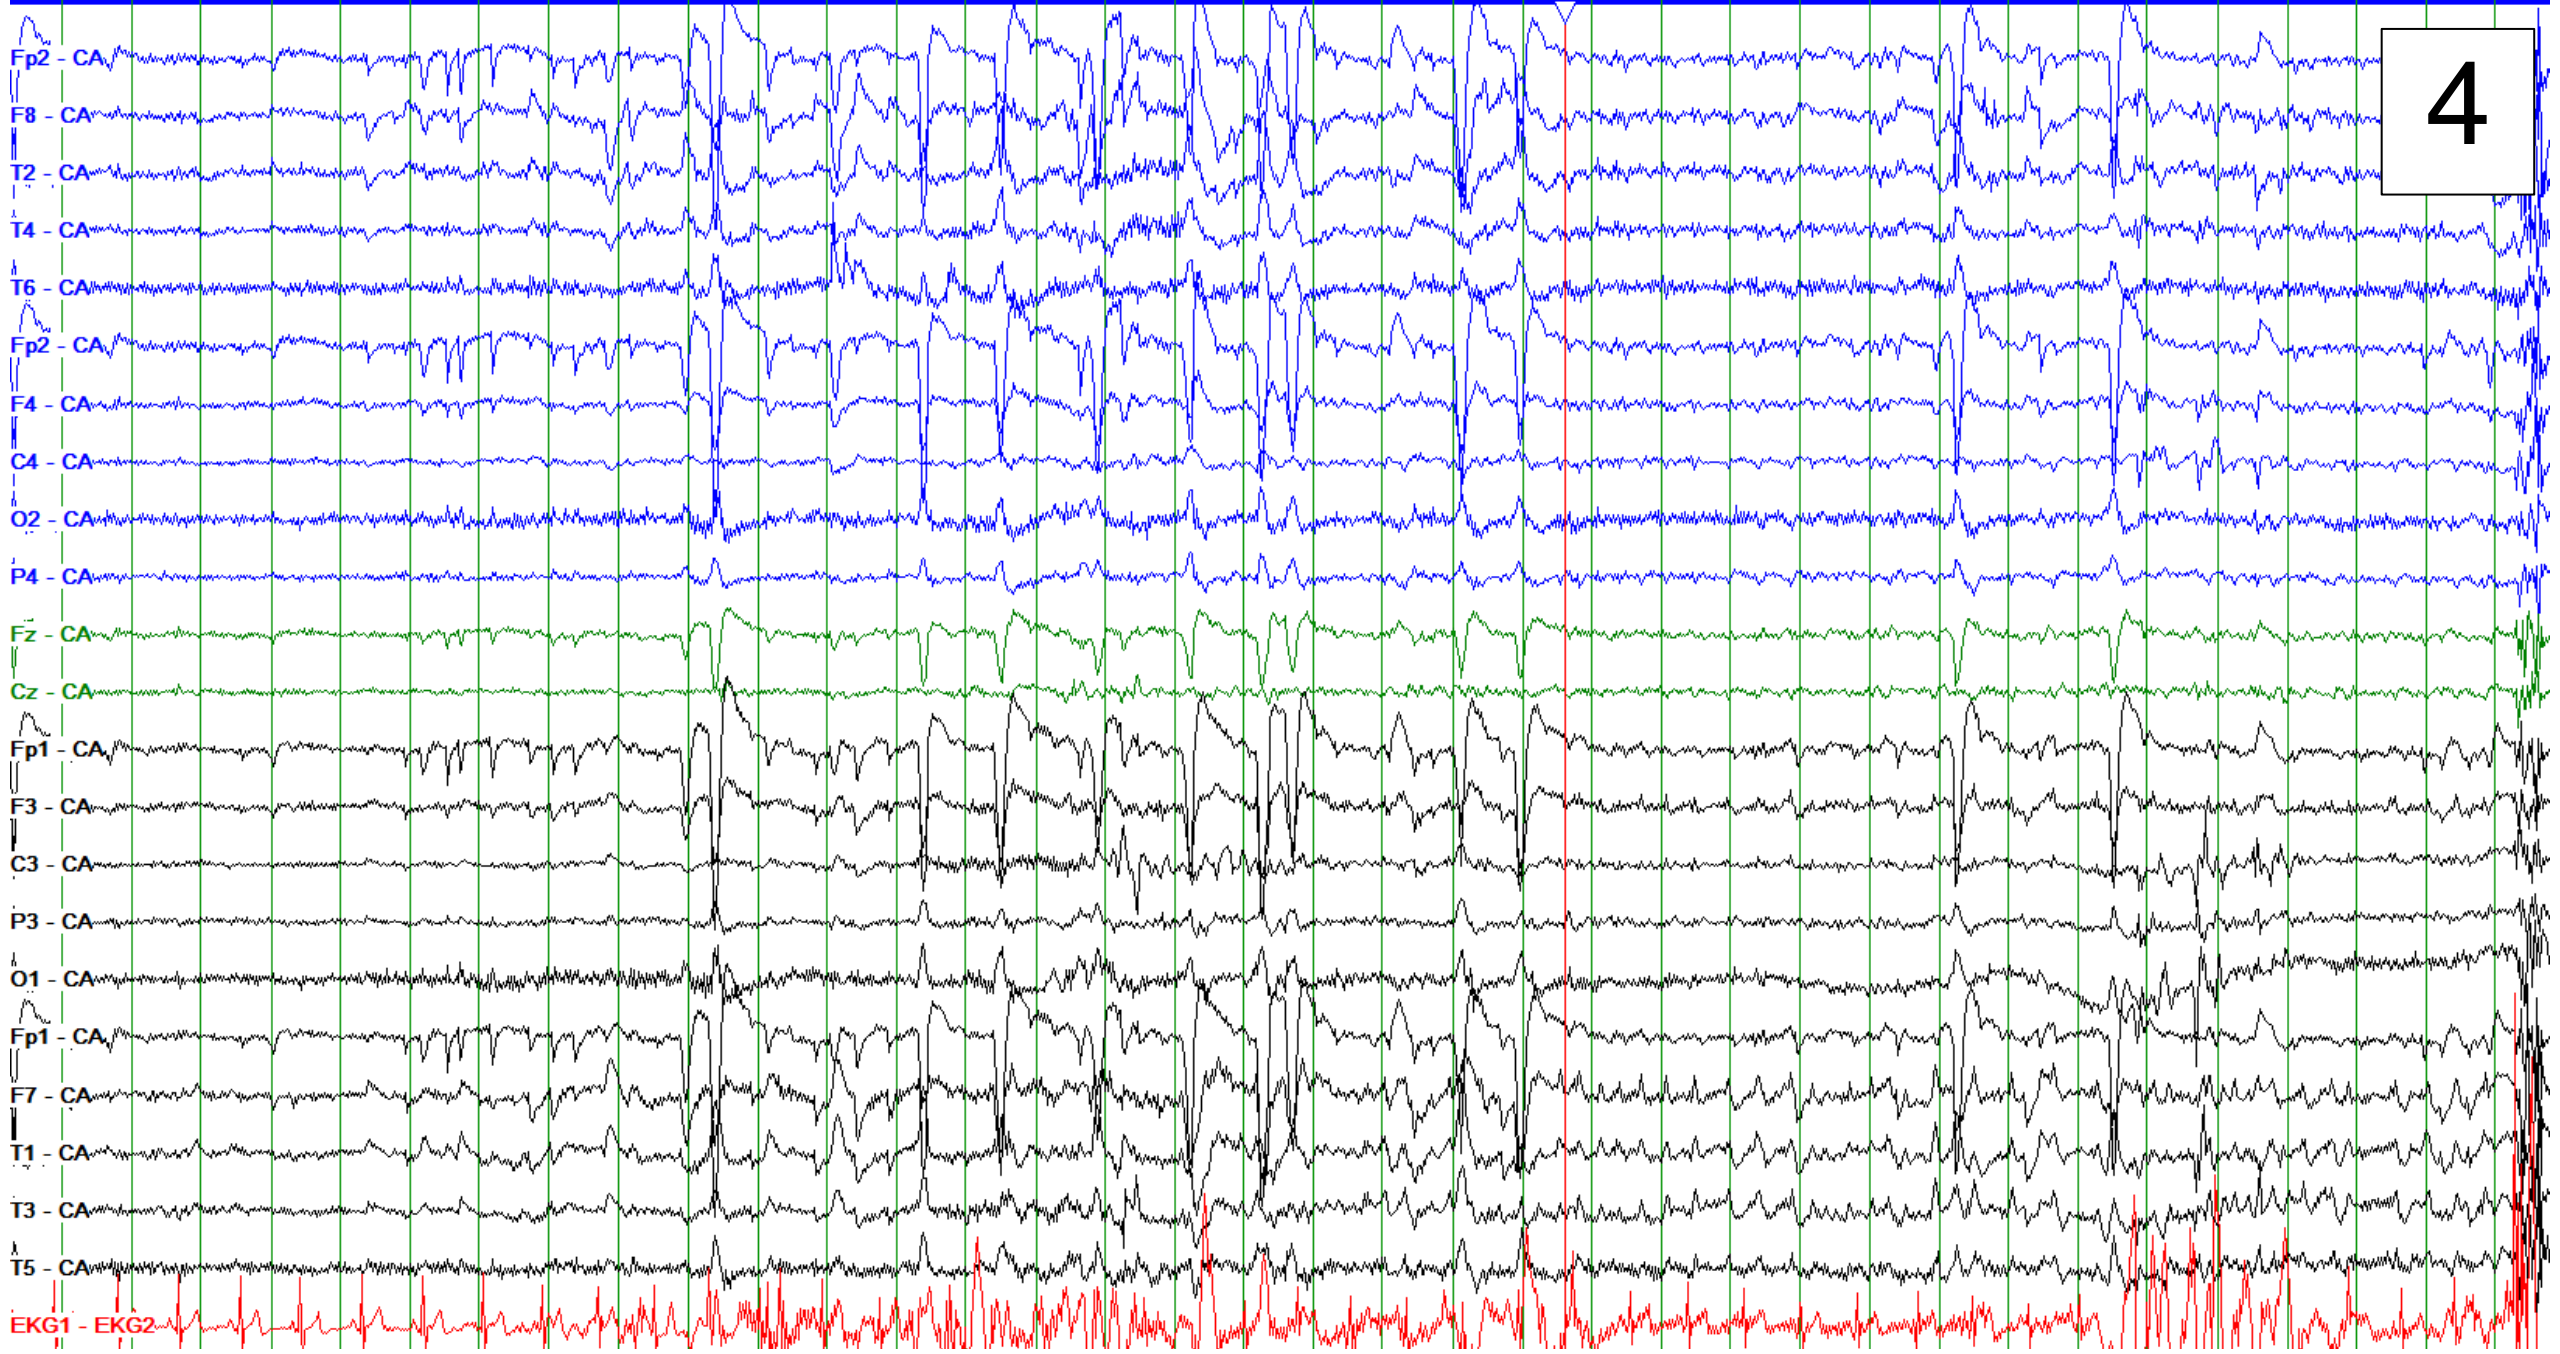

LFF 1 Hz, HFF 30 Hz, notch 50 Hz, sensitivity 10  $\mu$ v/mm, timebase 15 mm/s

5

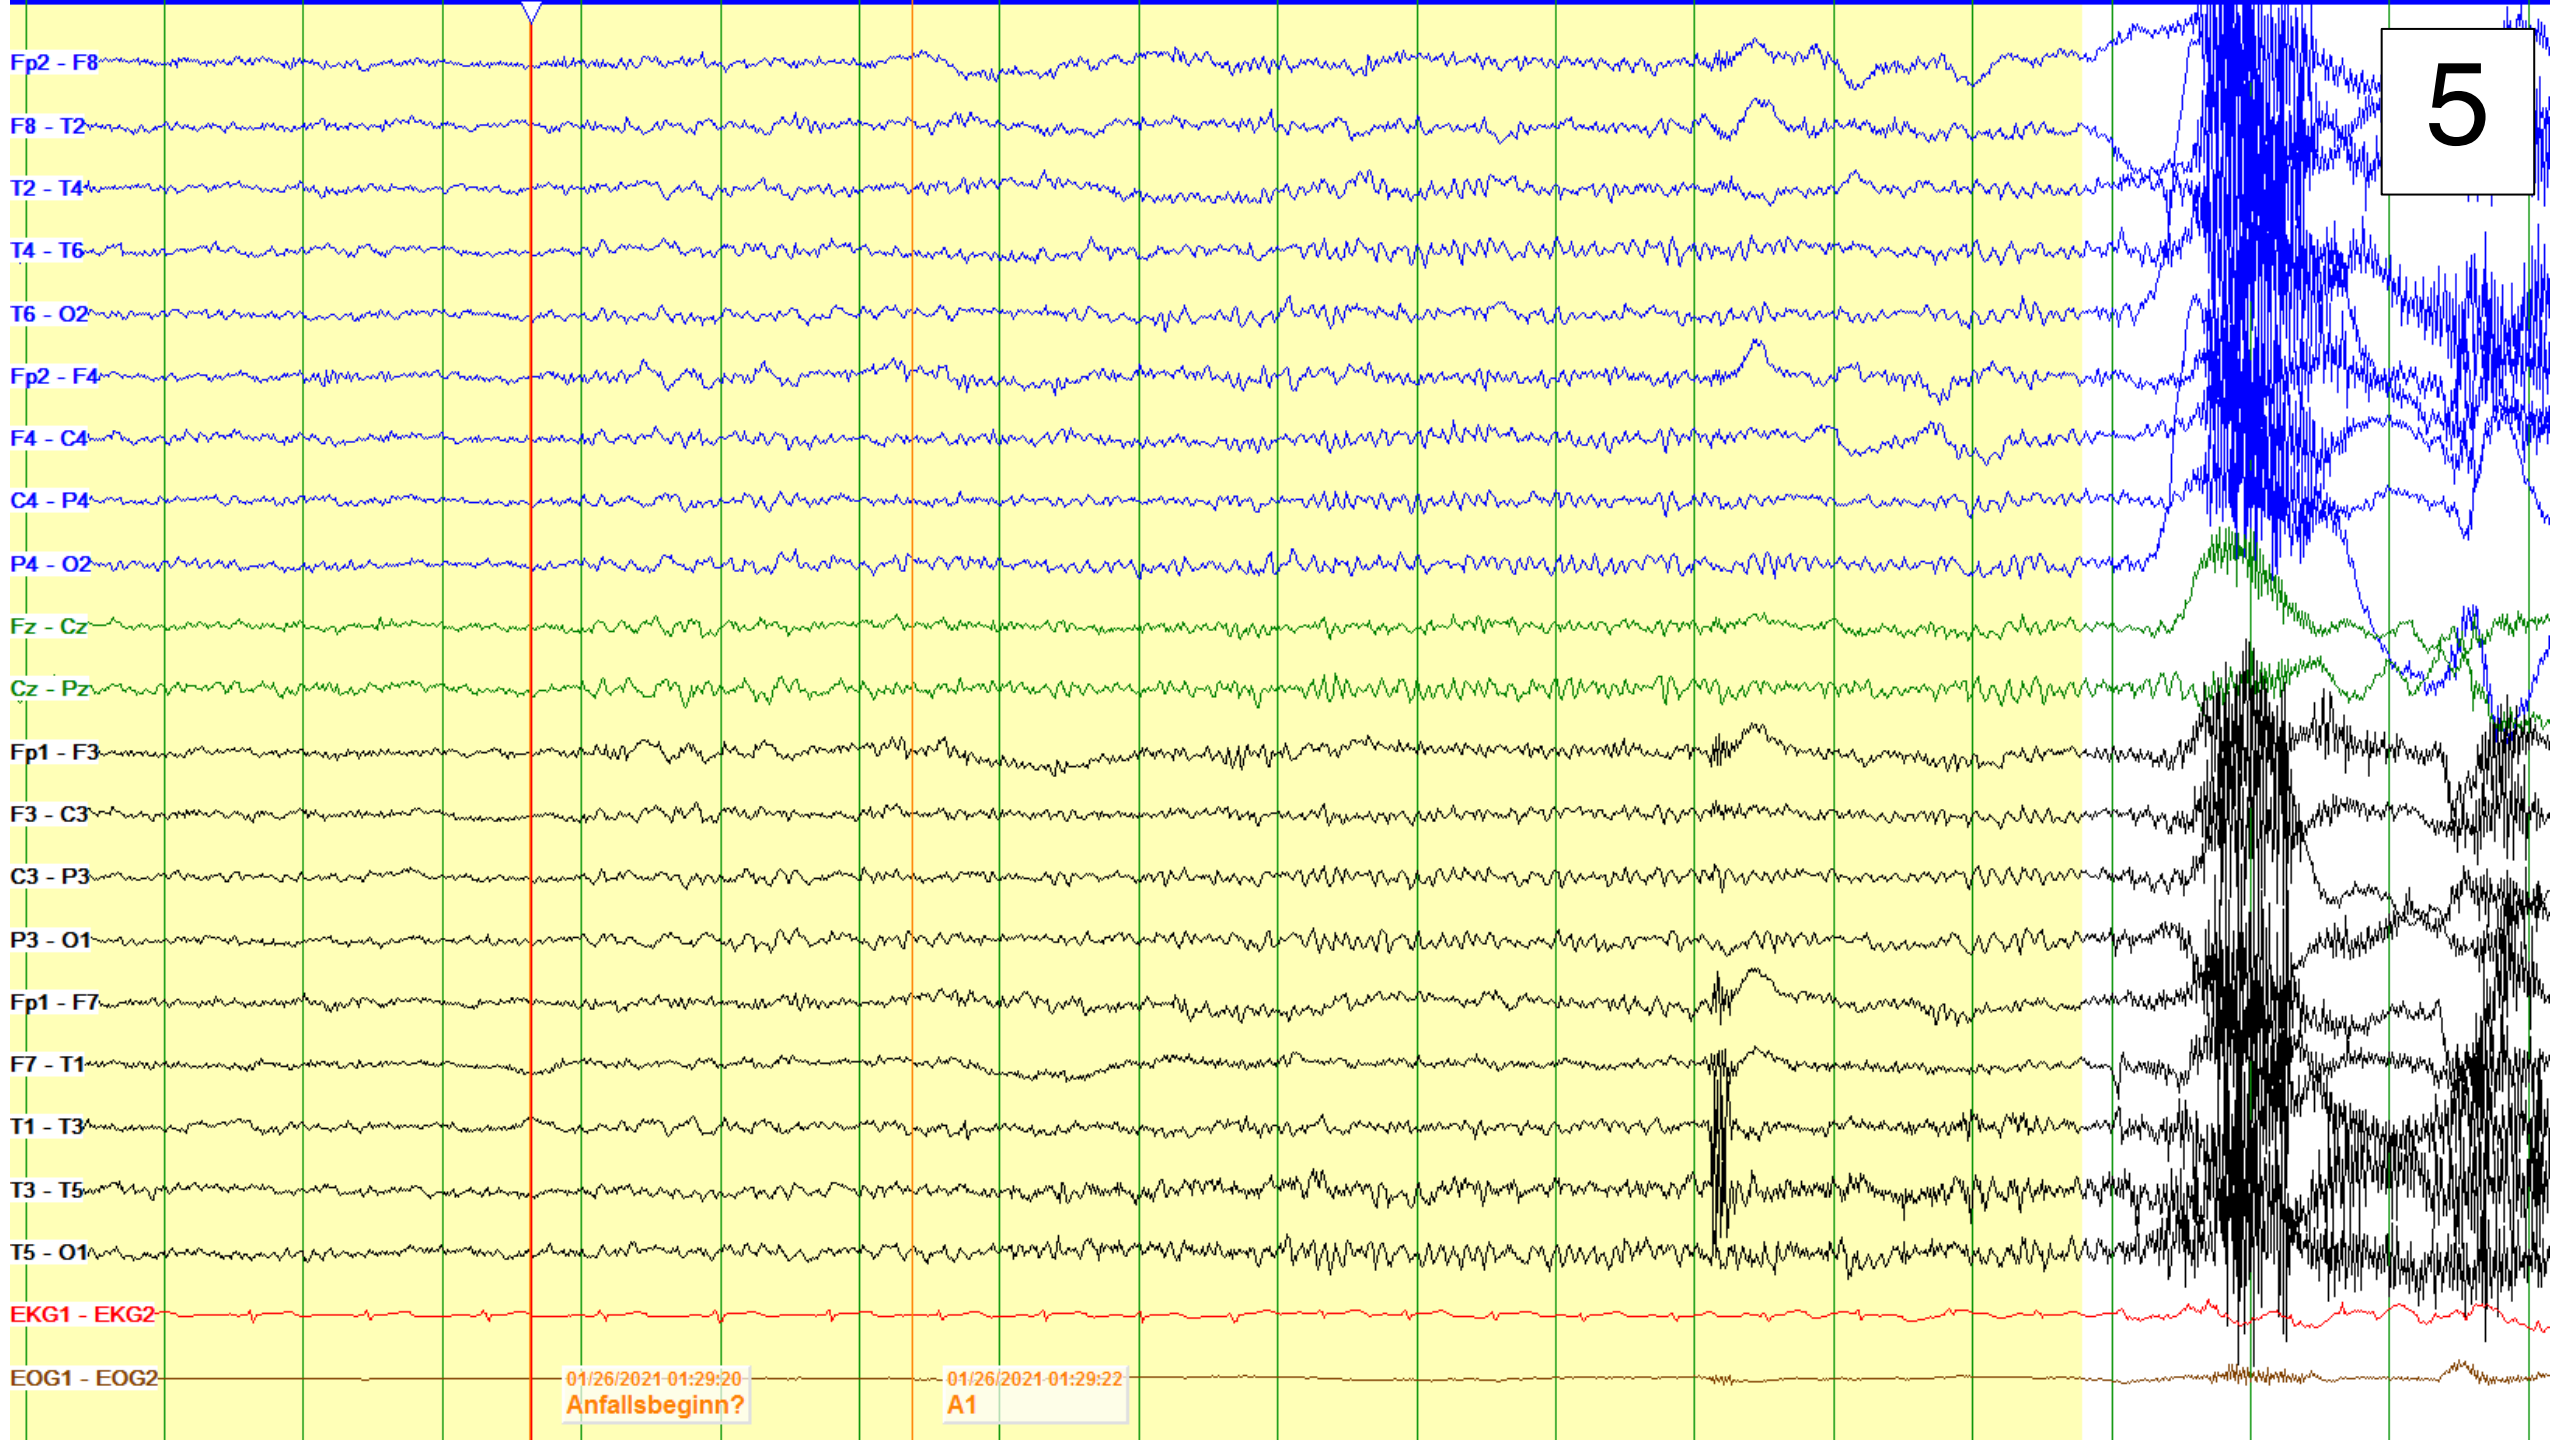



5

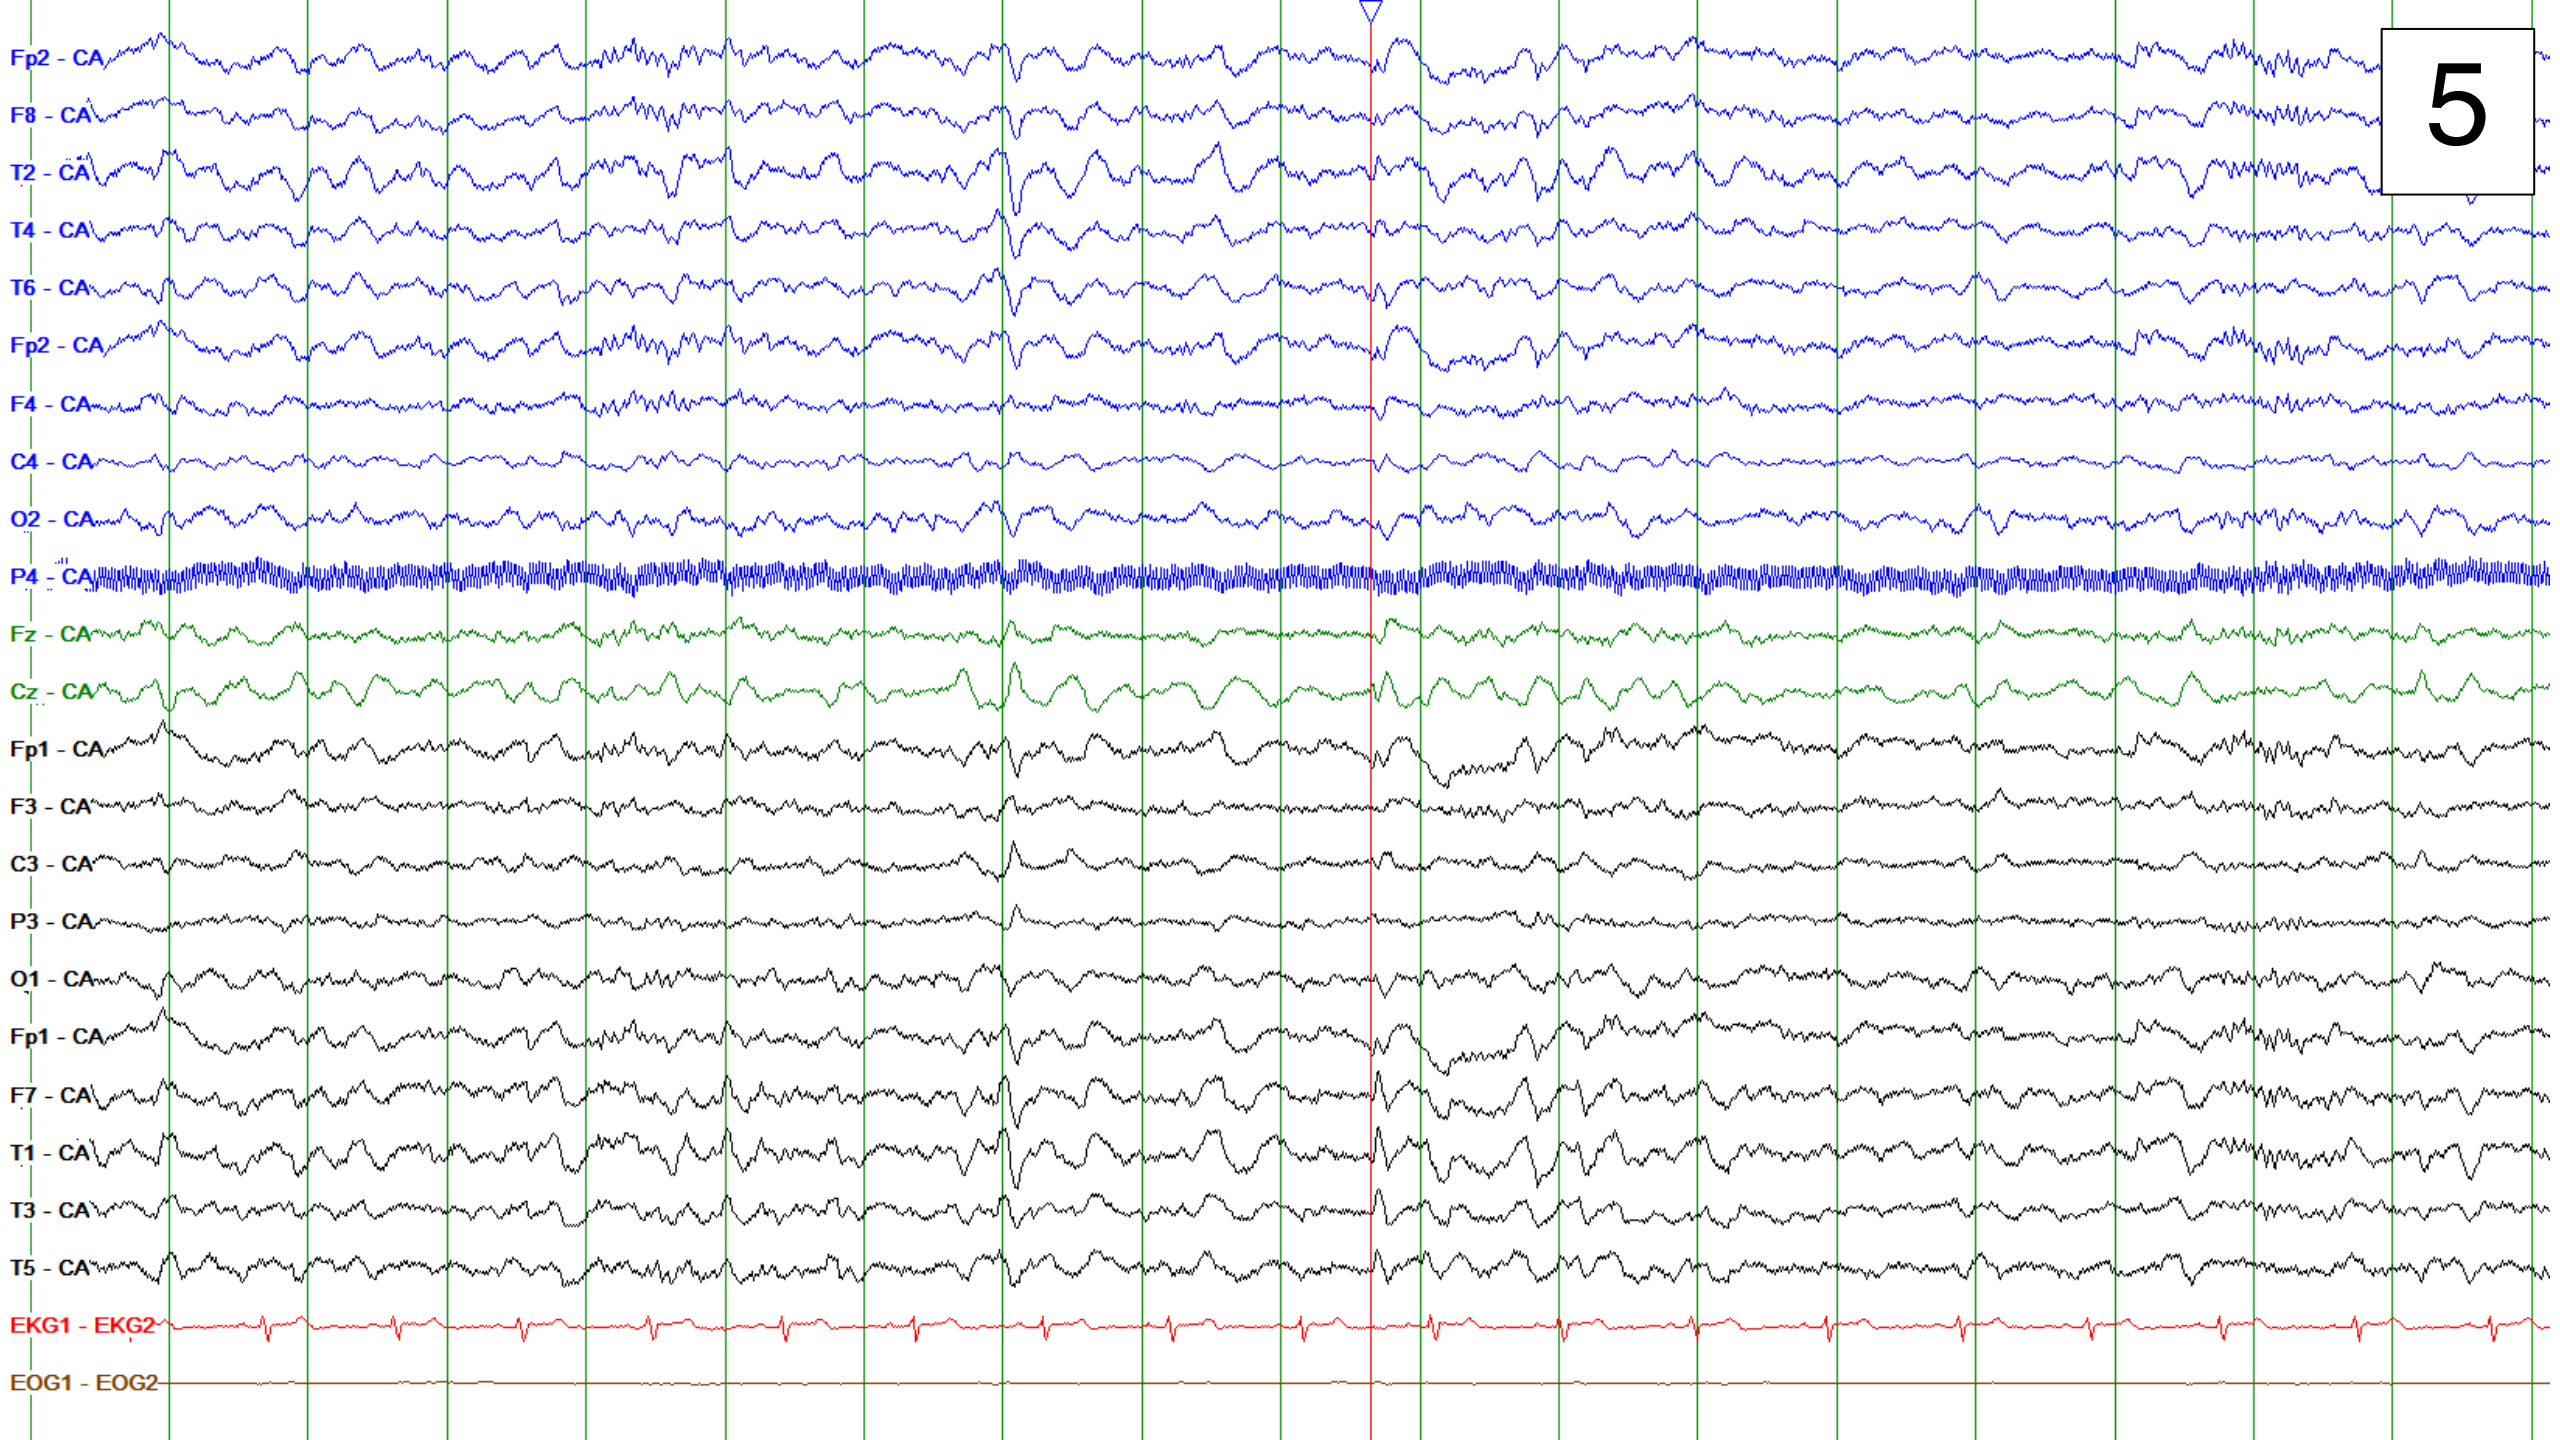

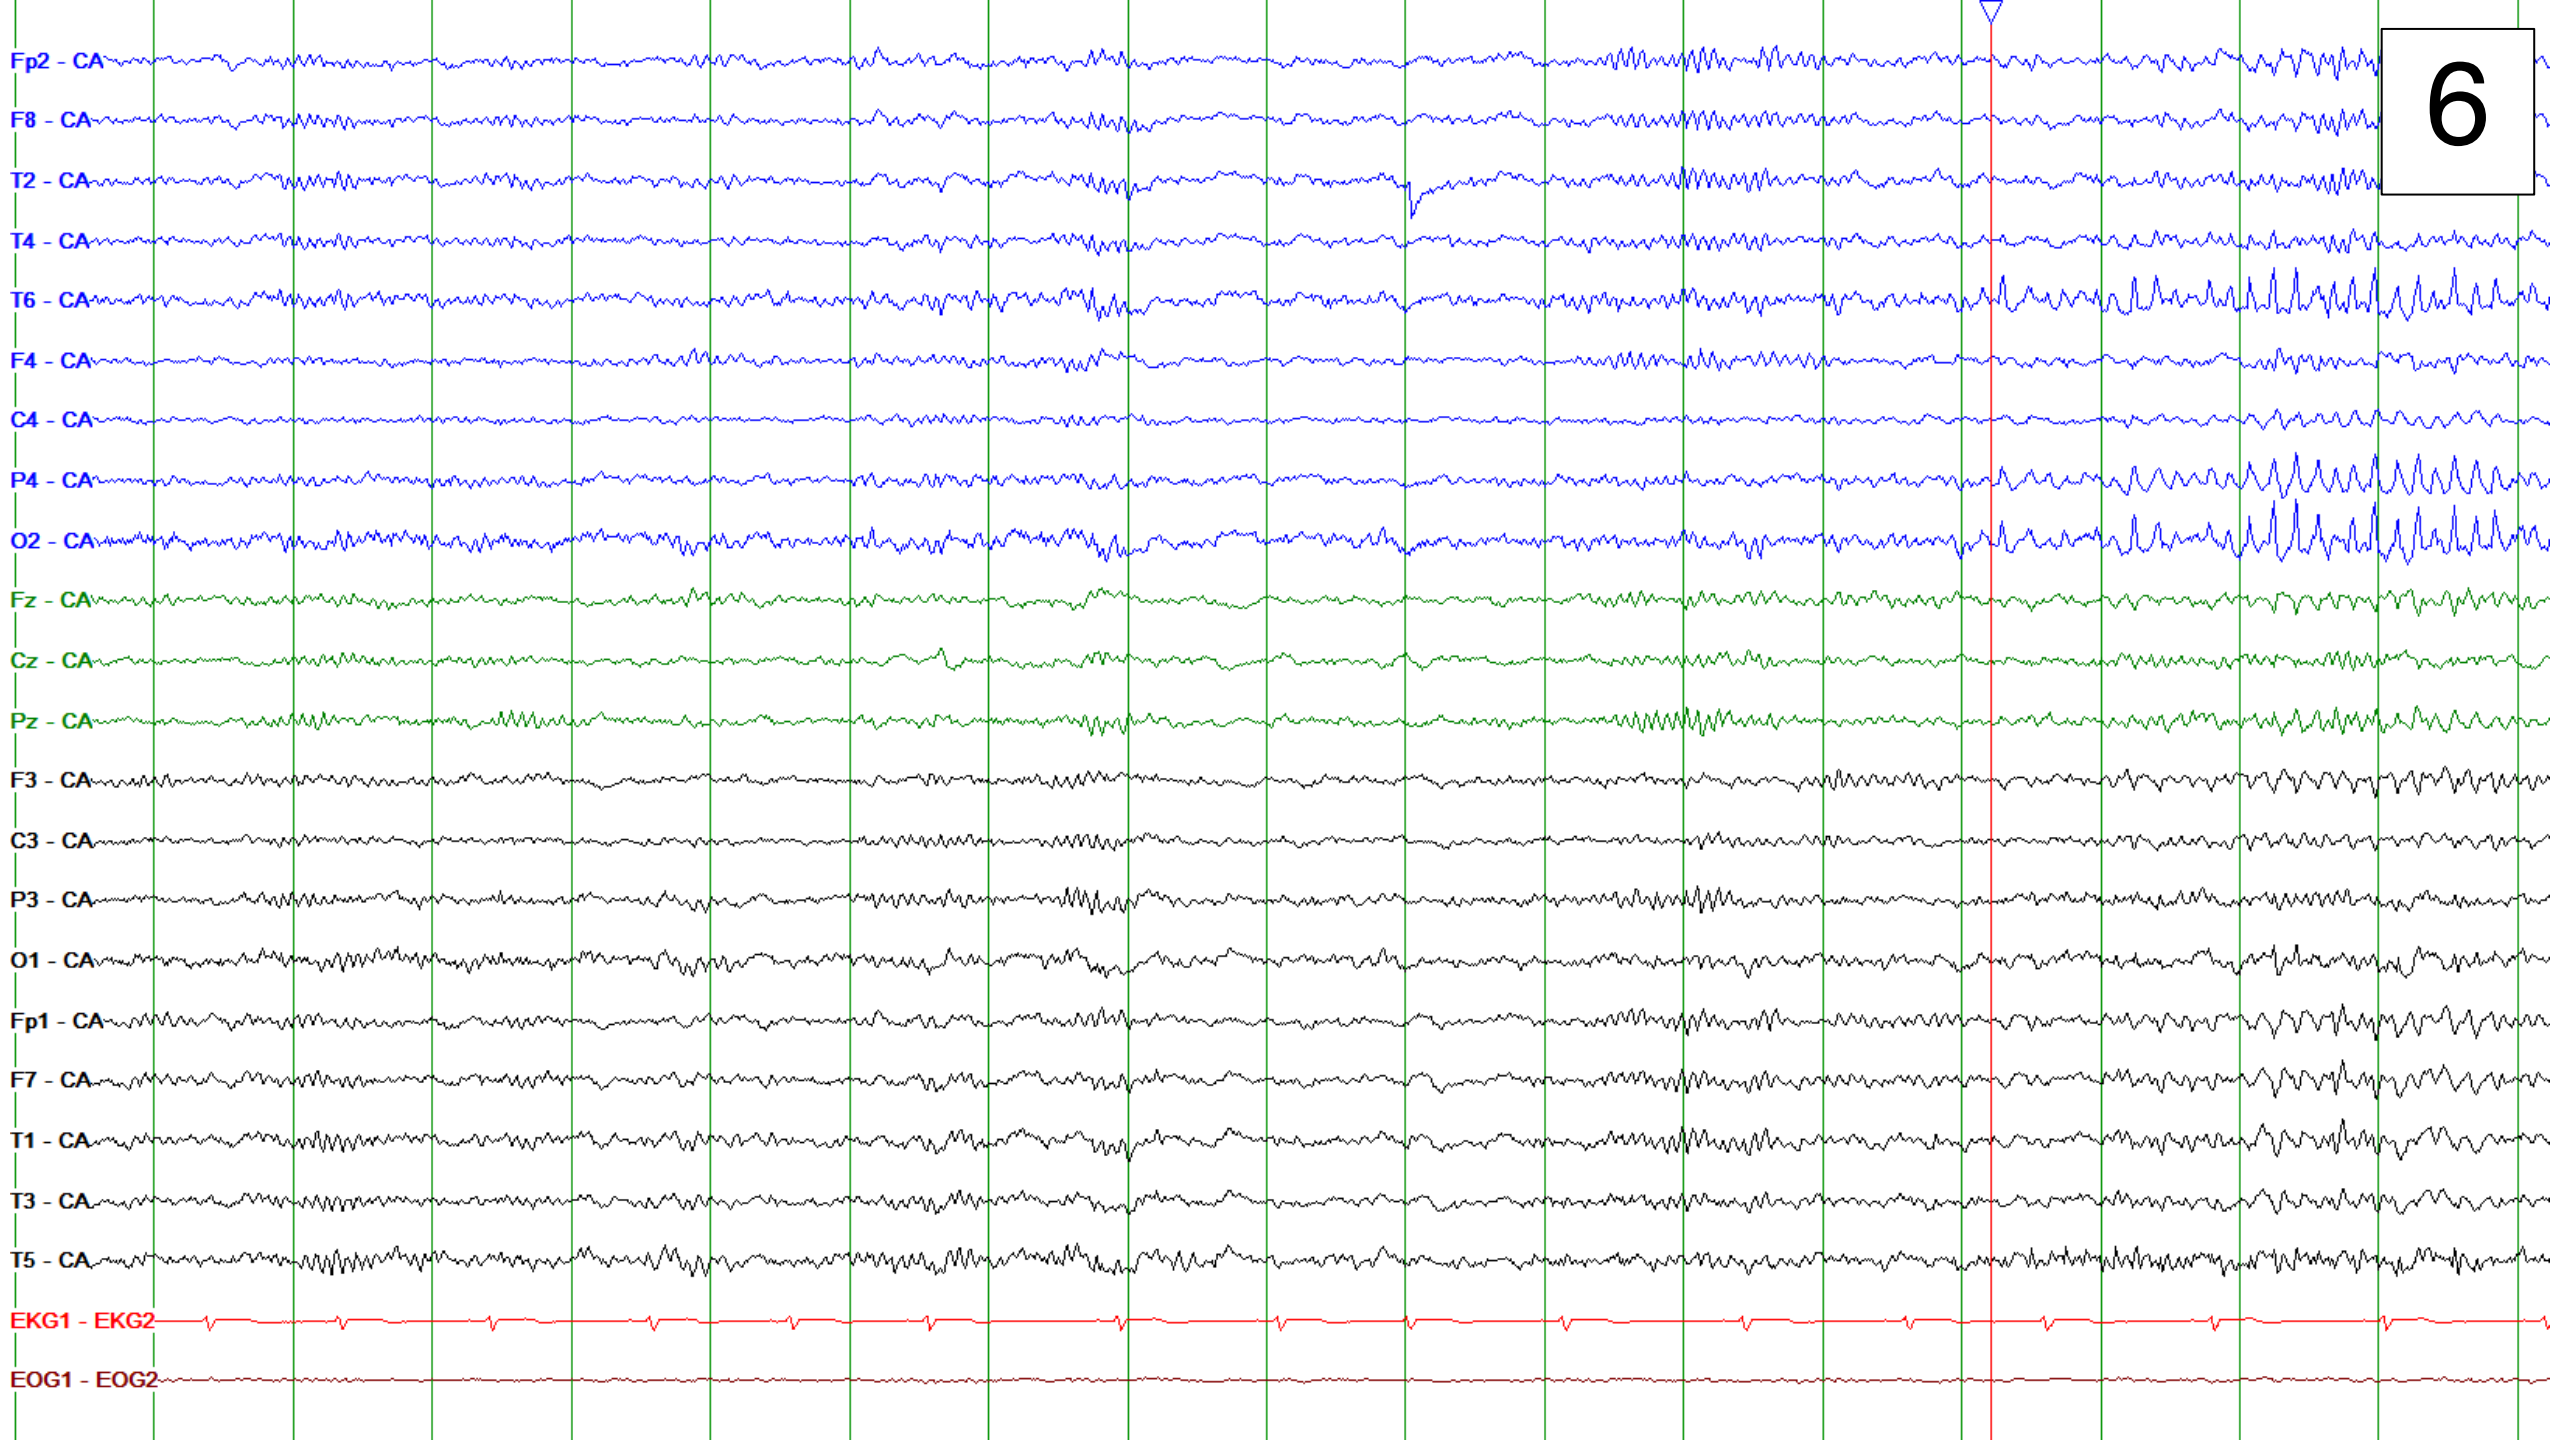

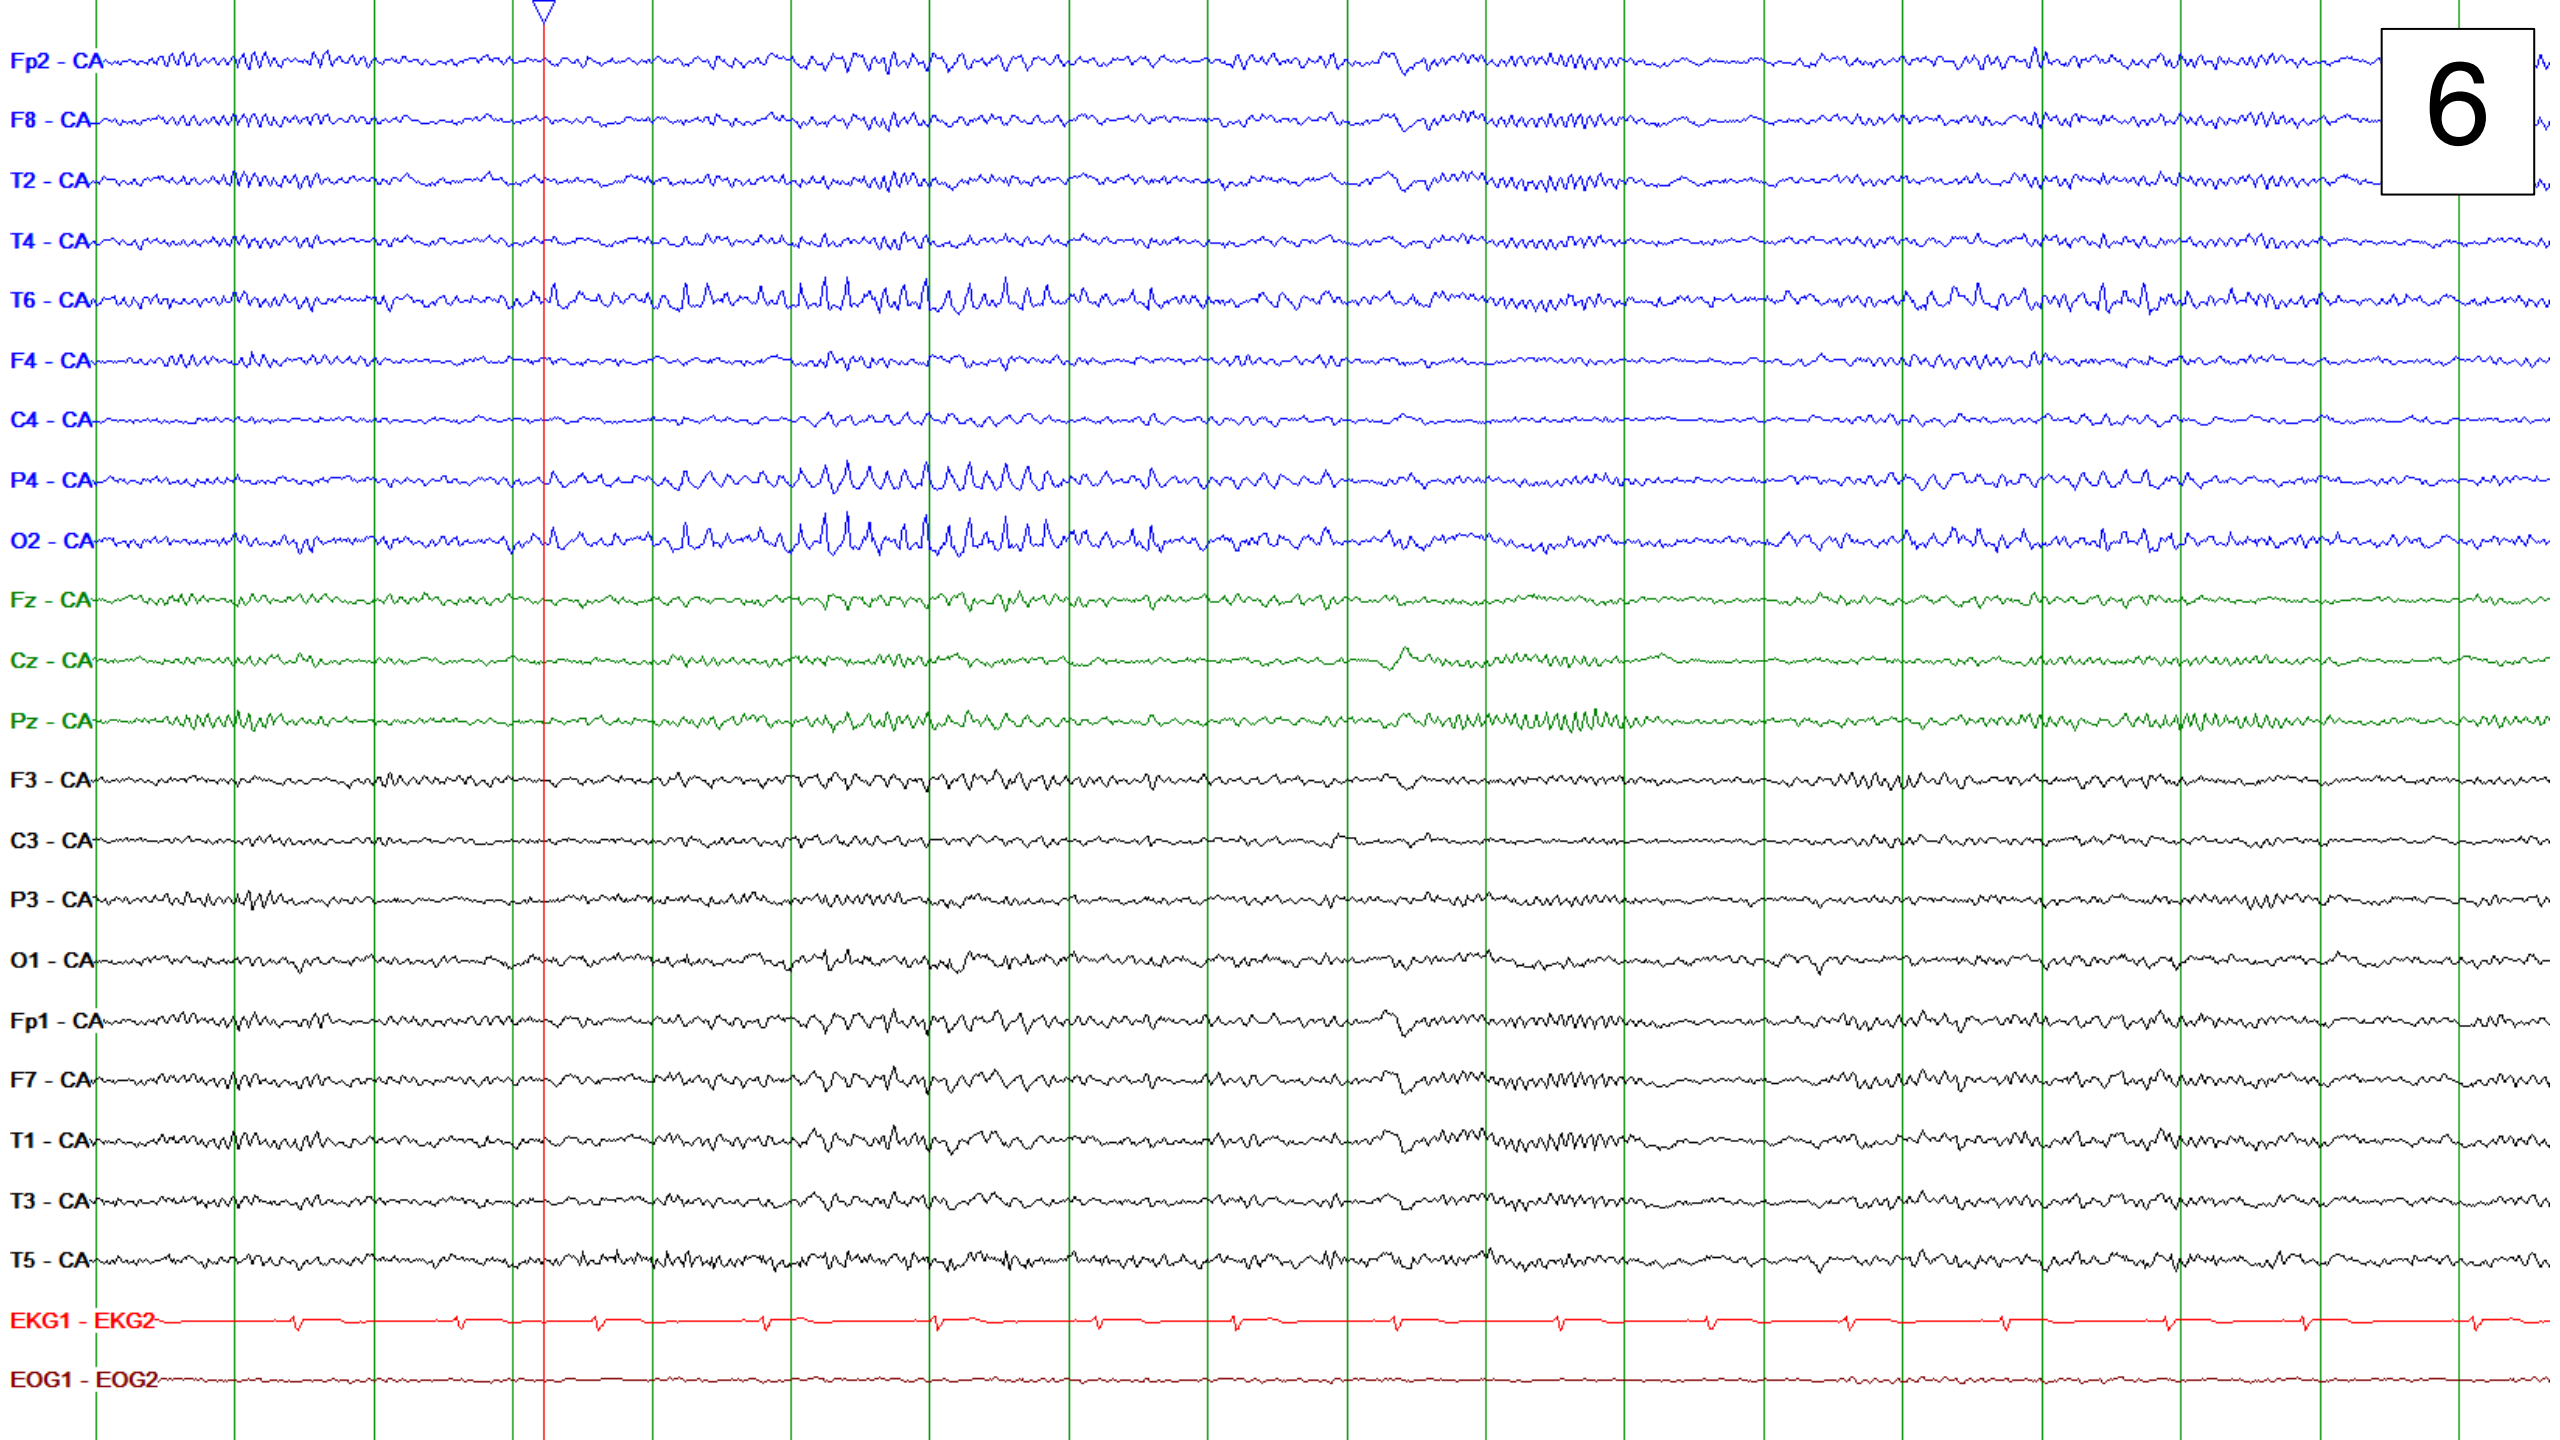

7

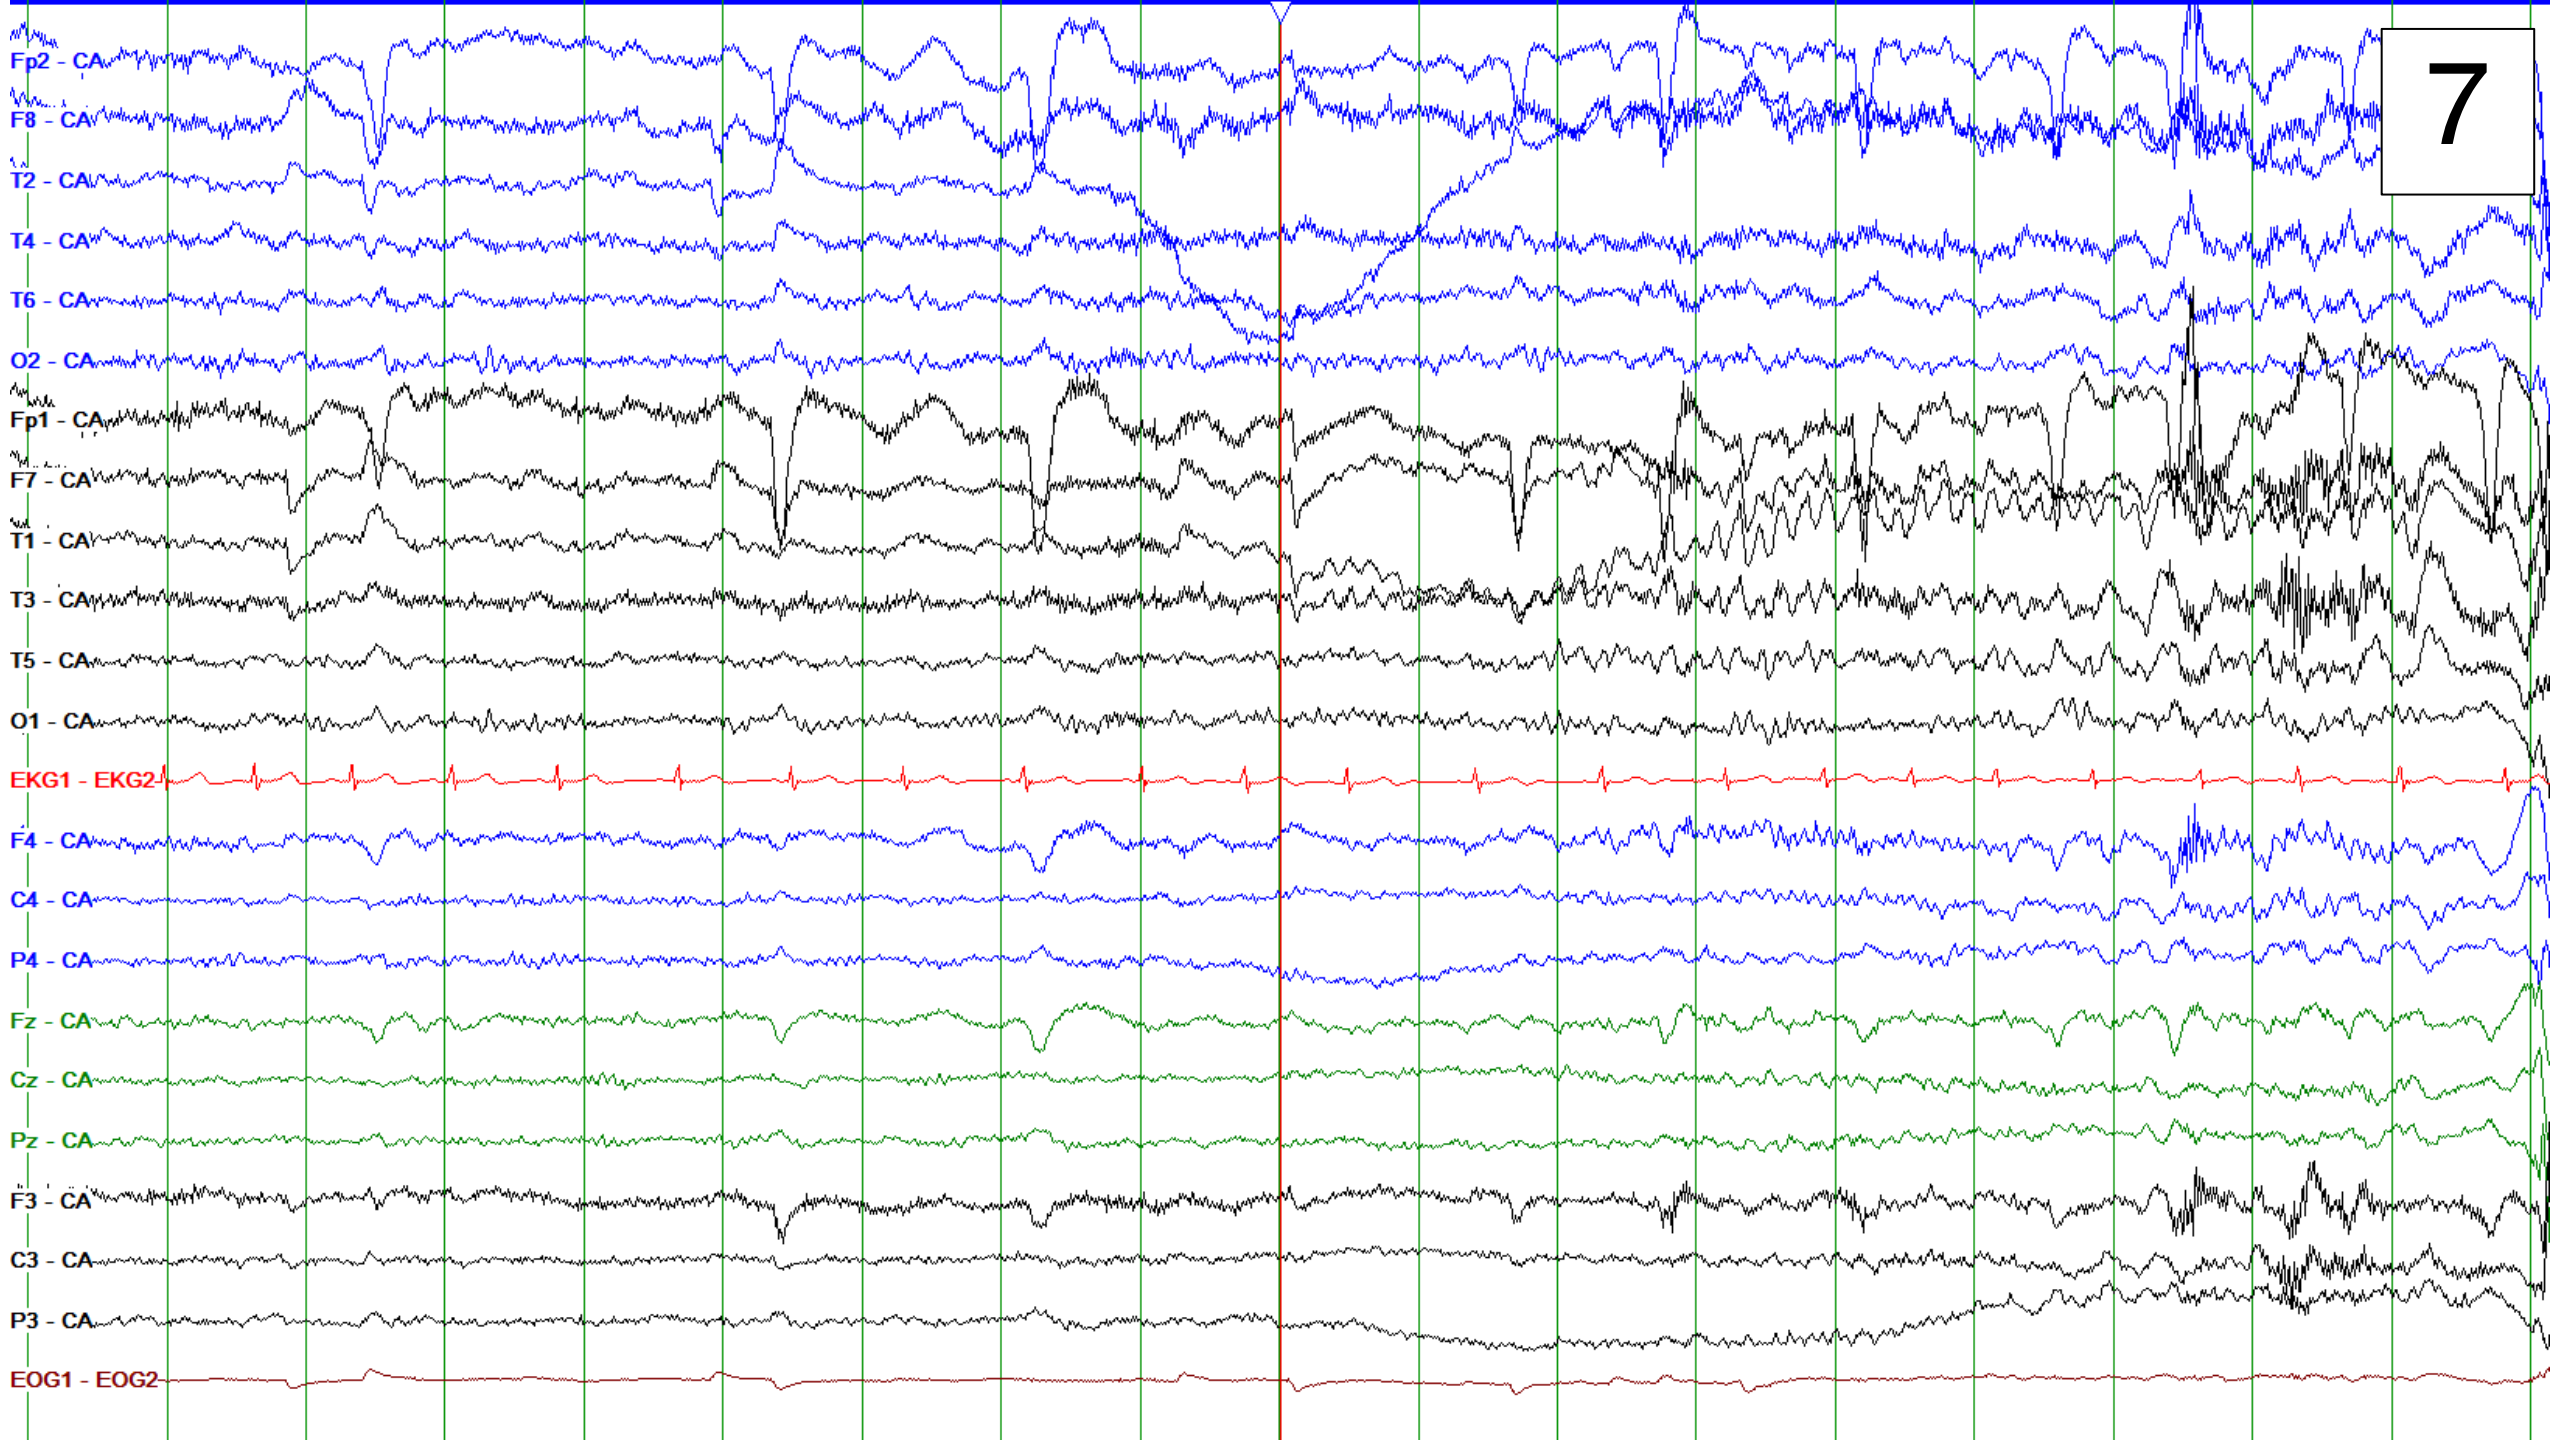



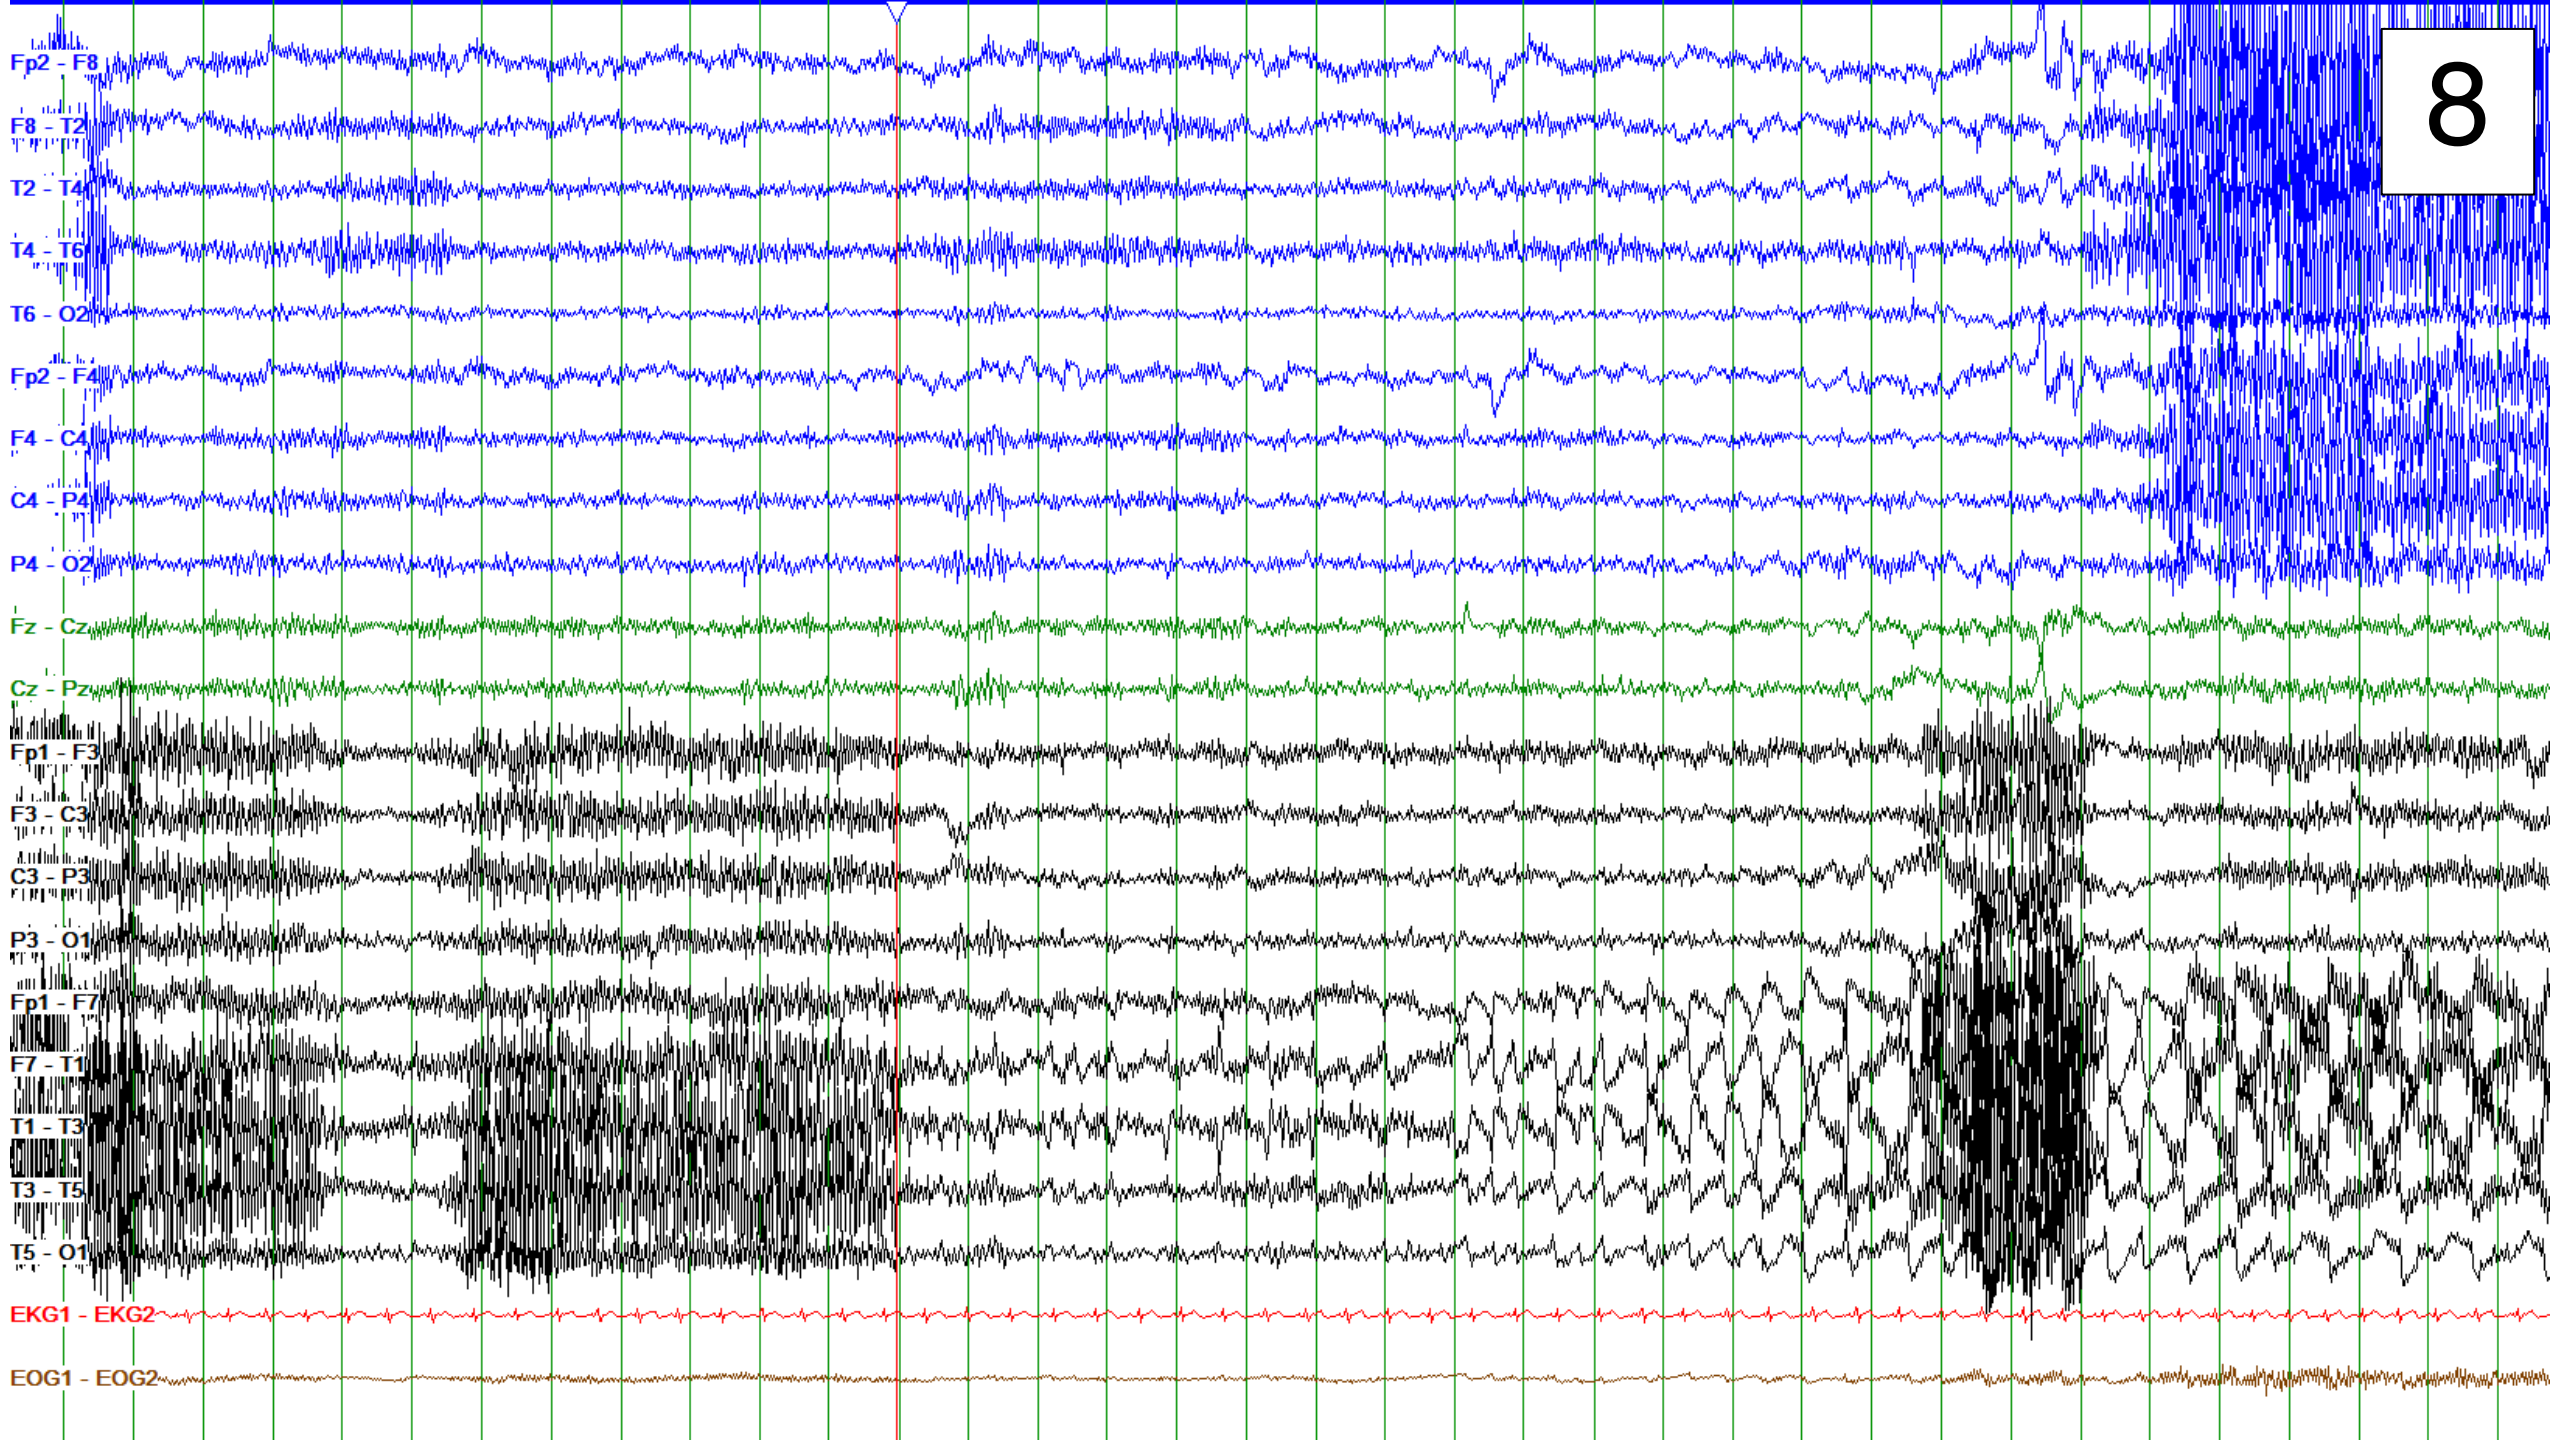

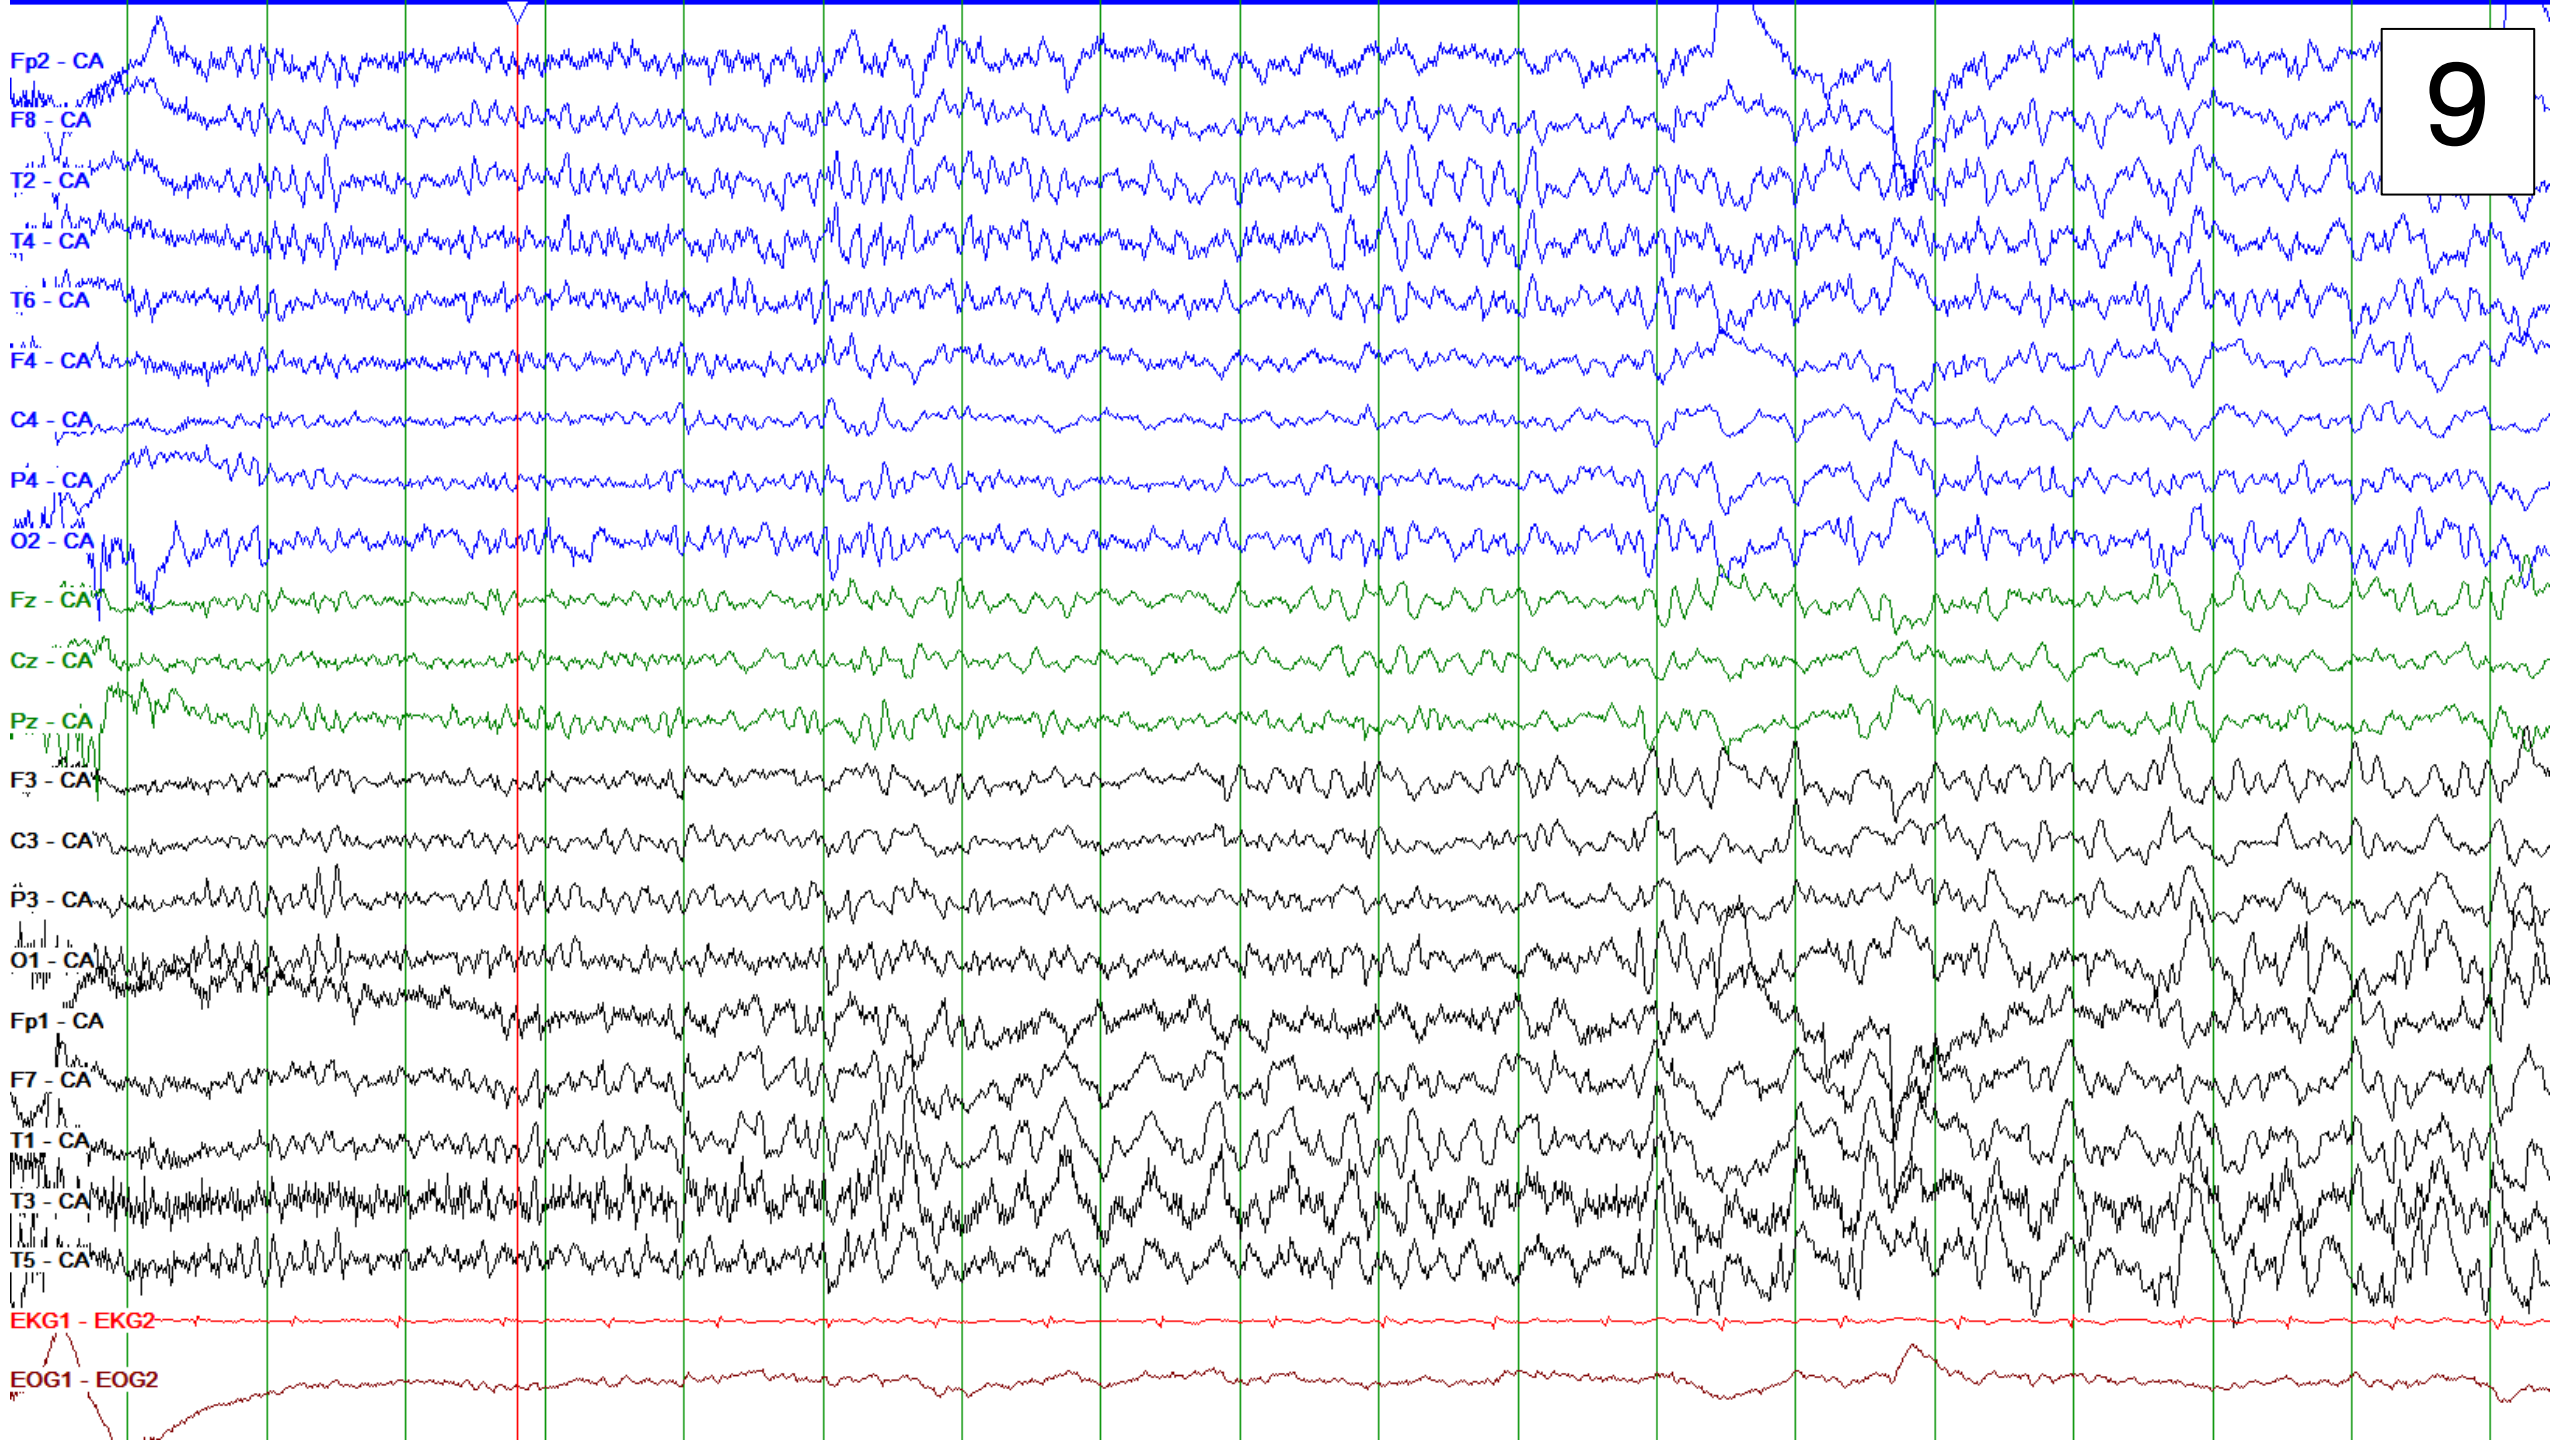

10

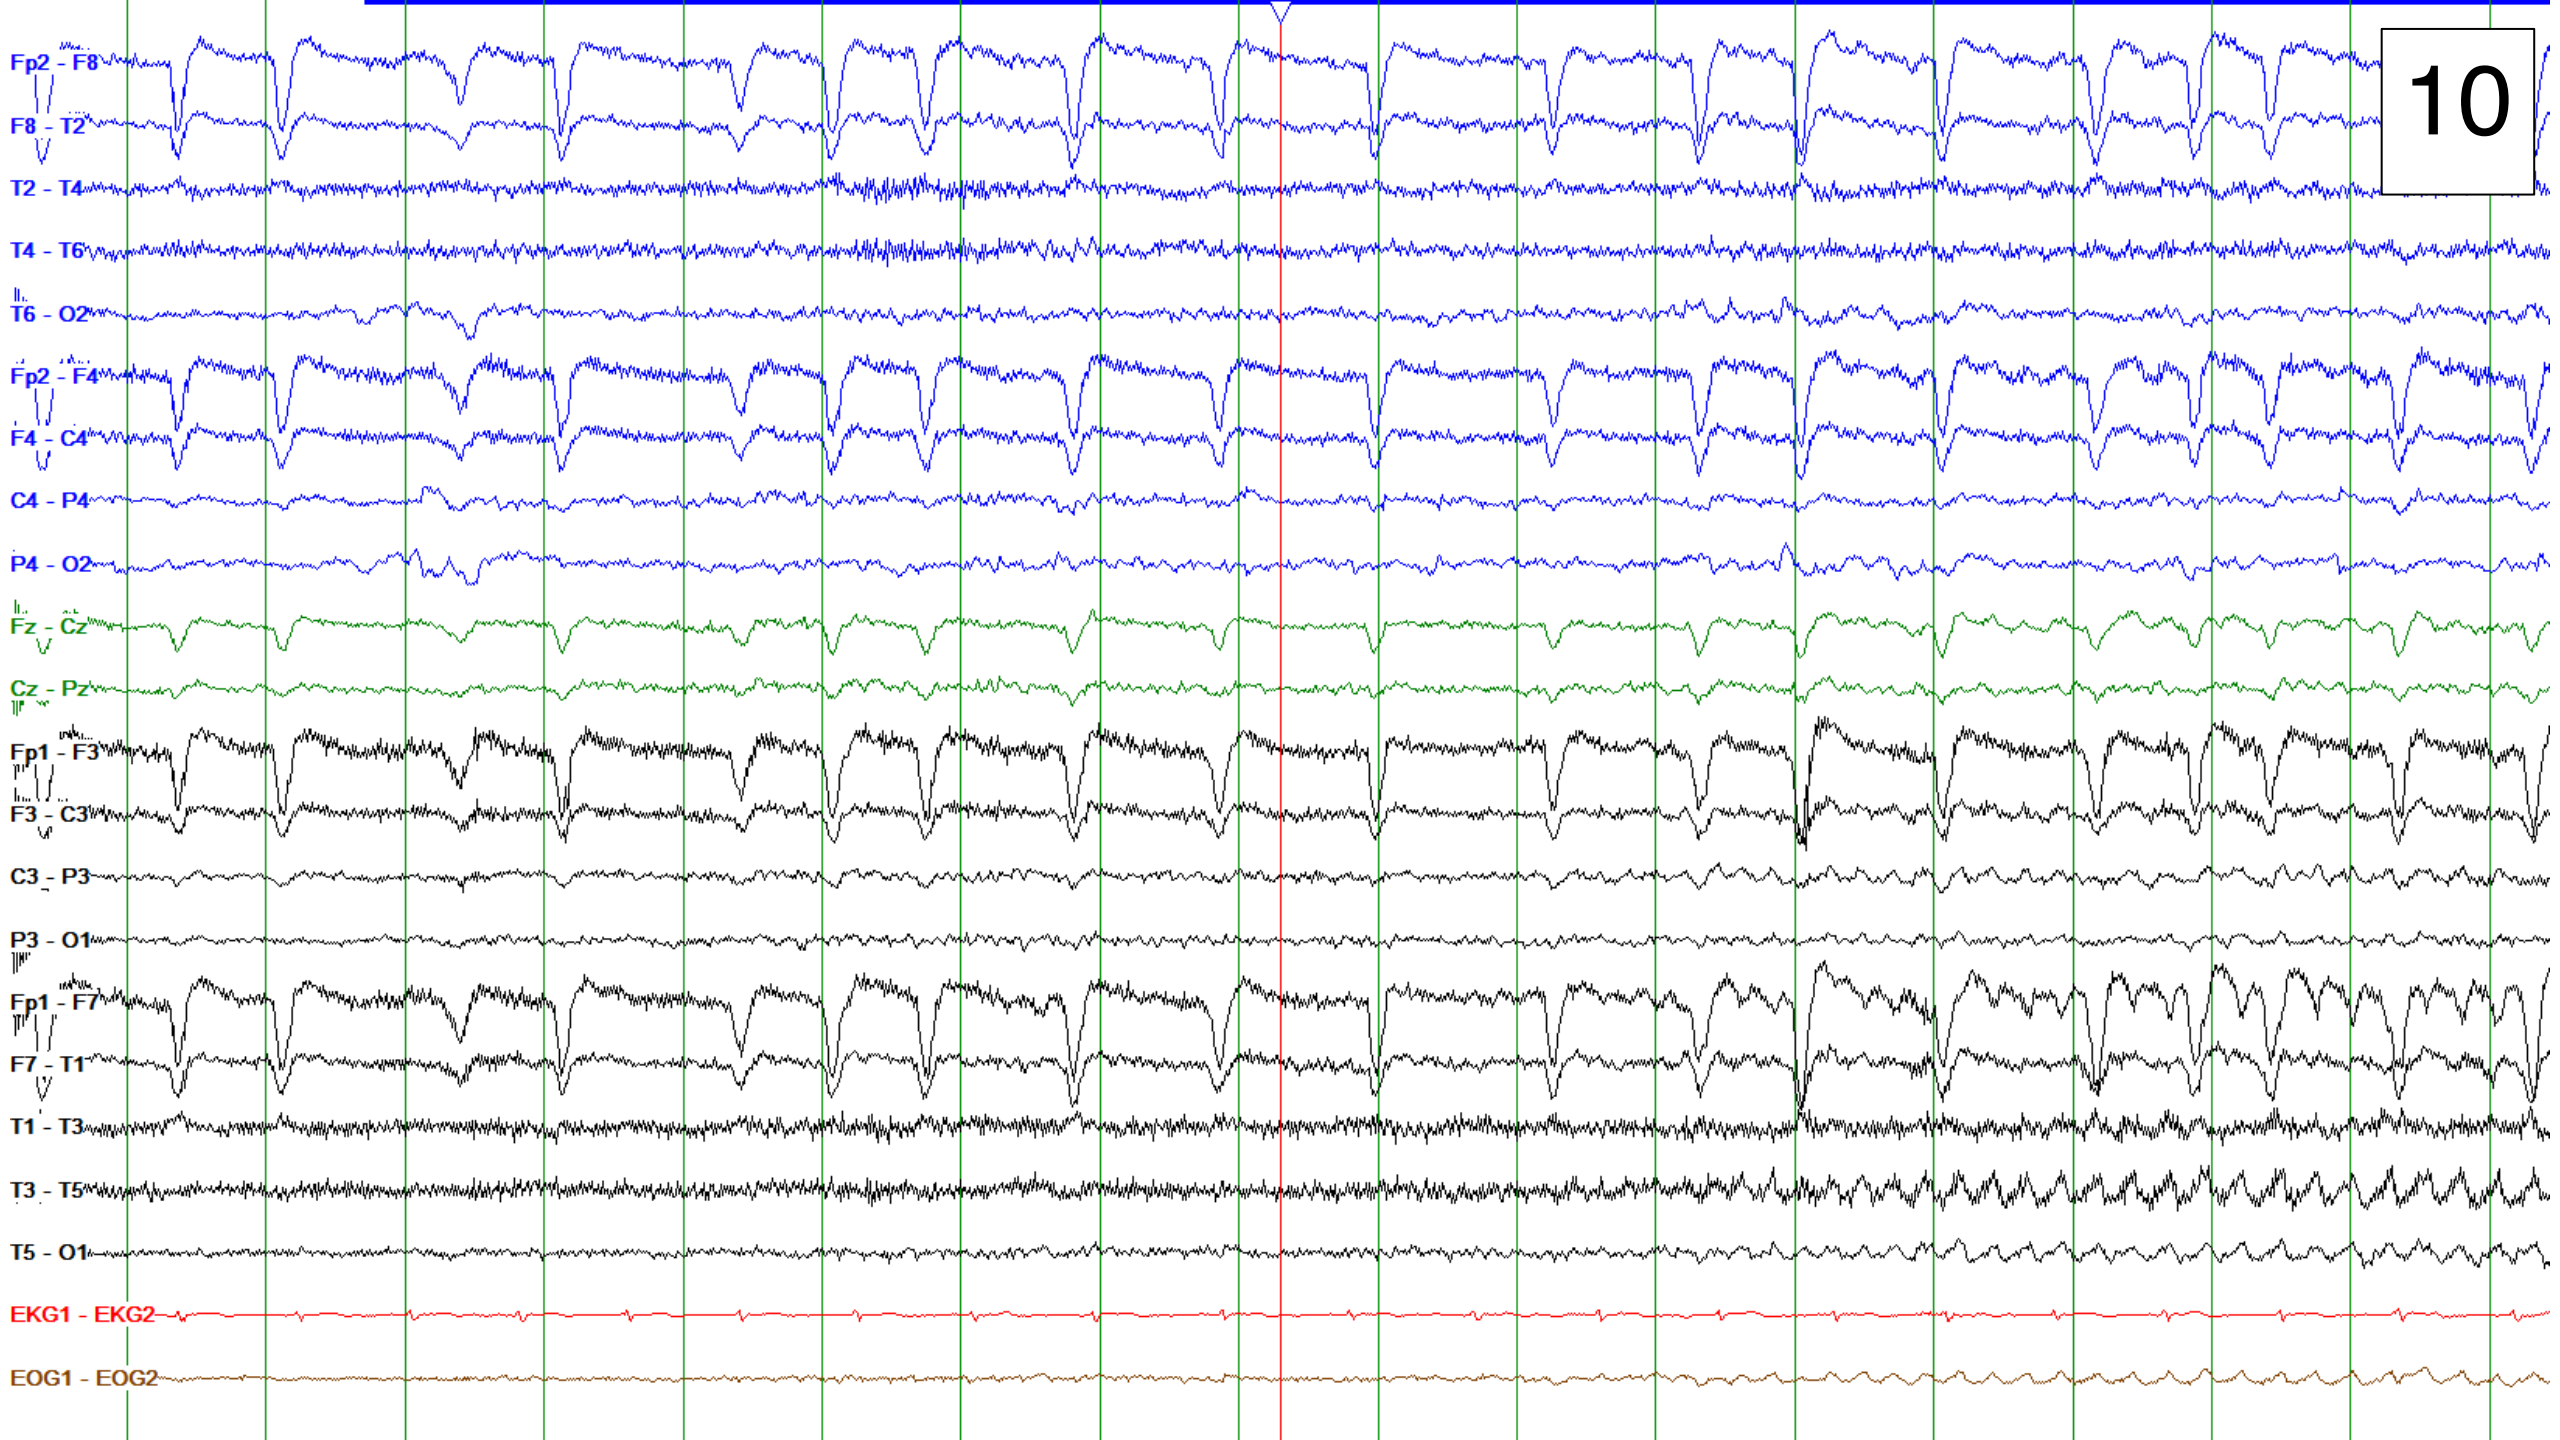



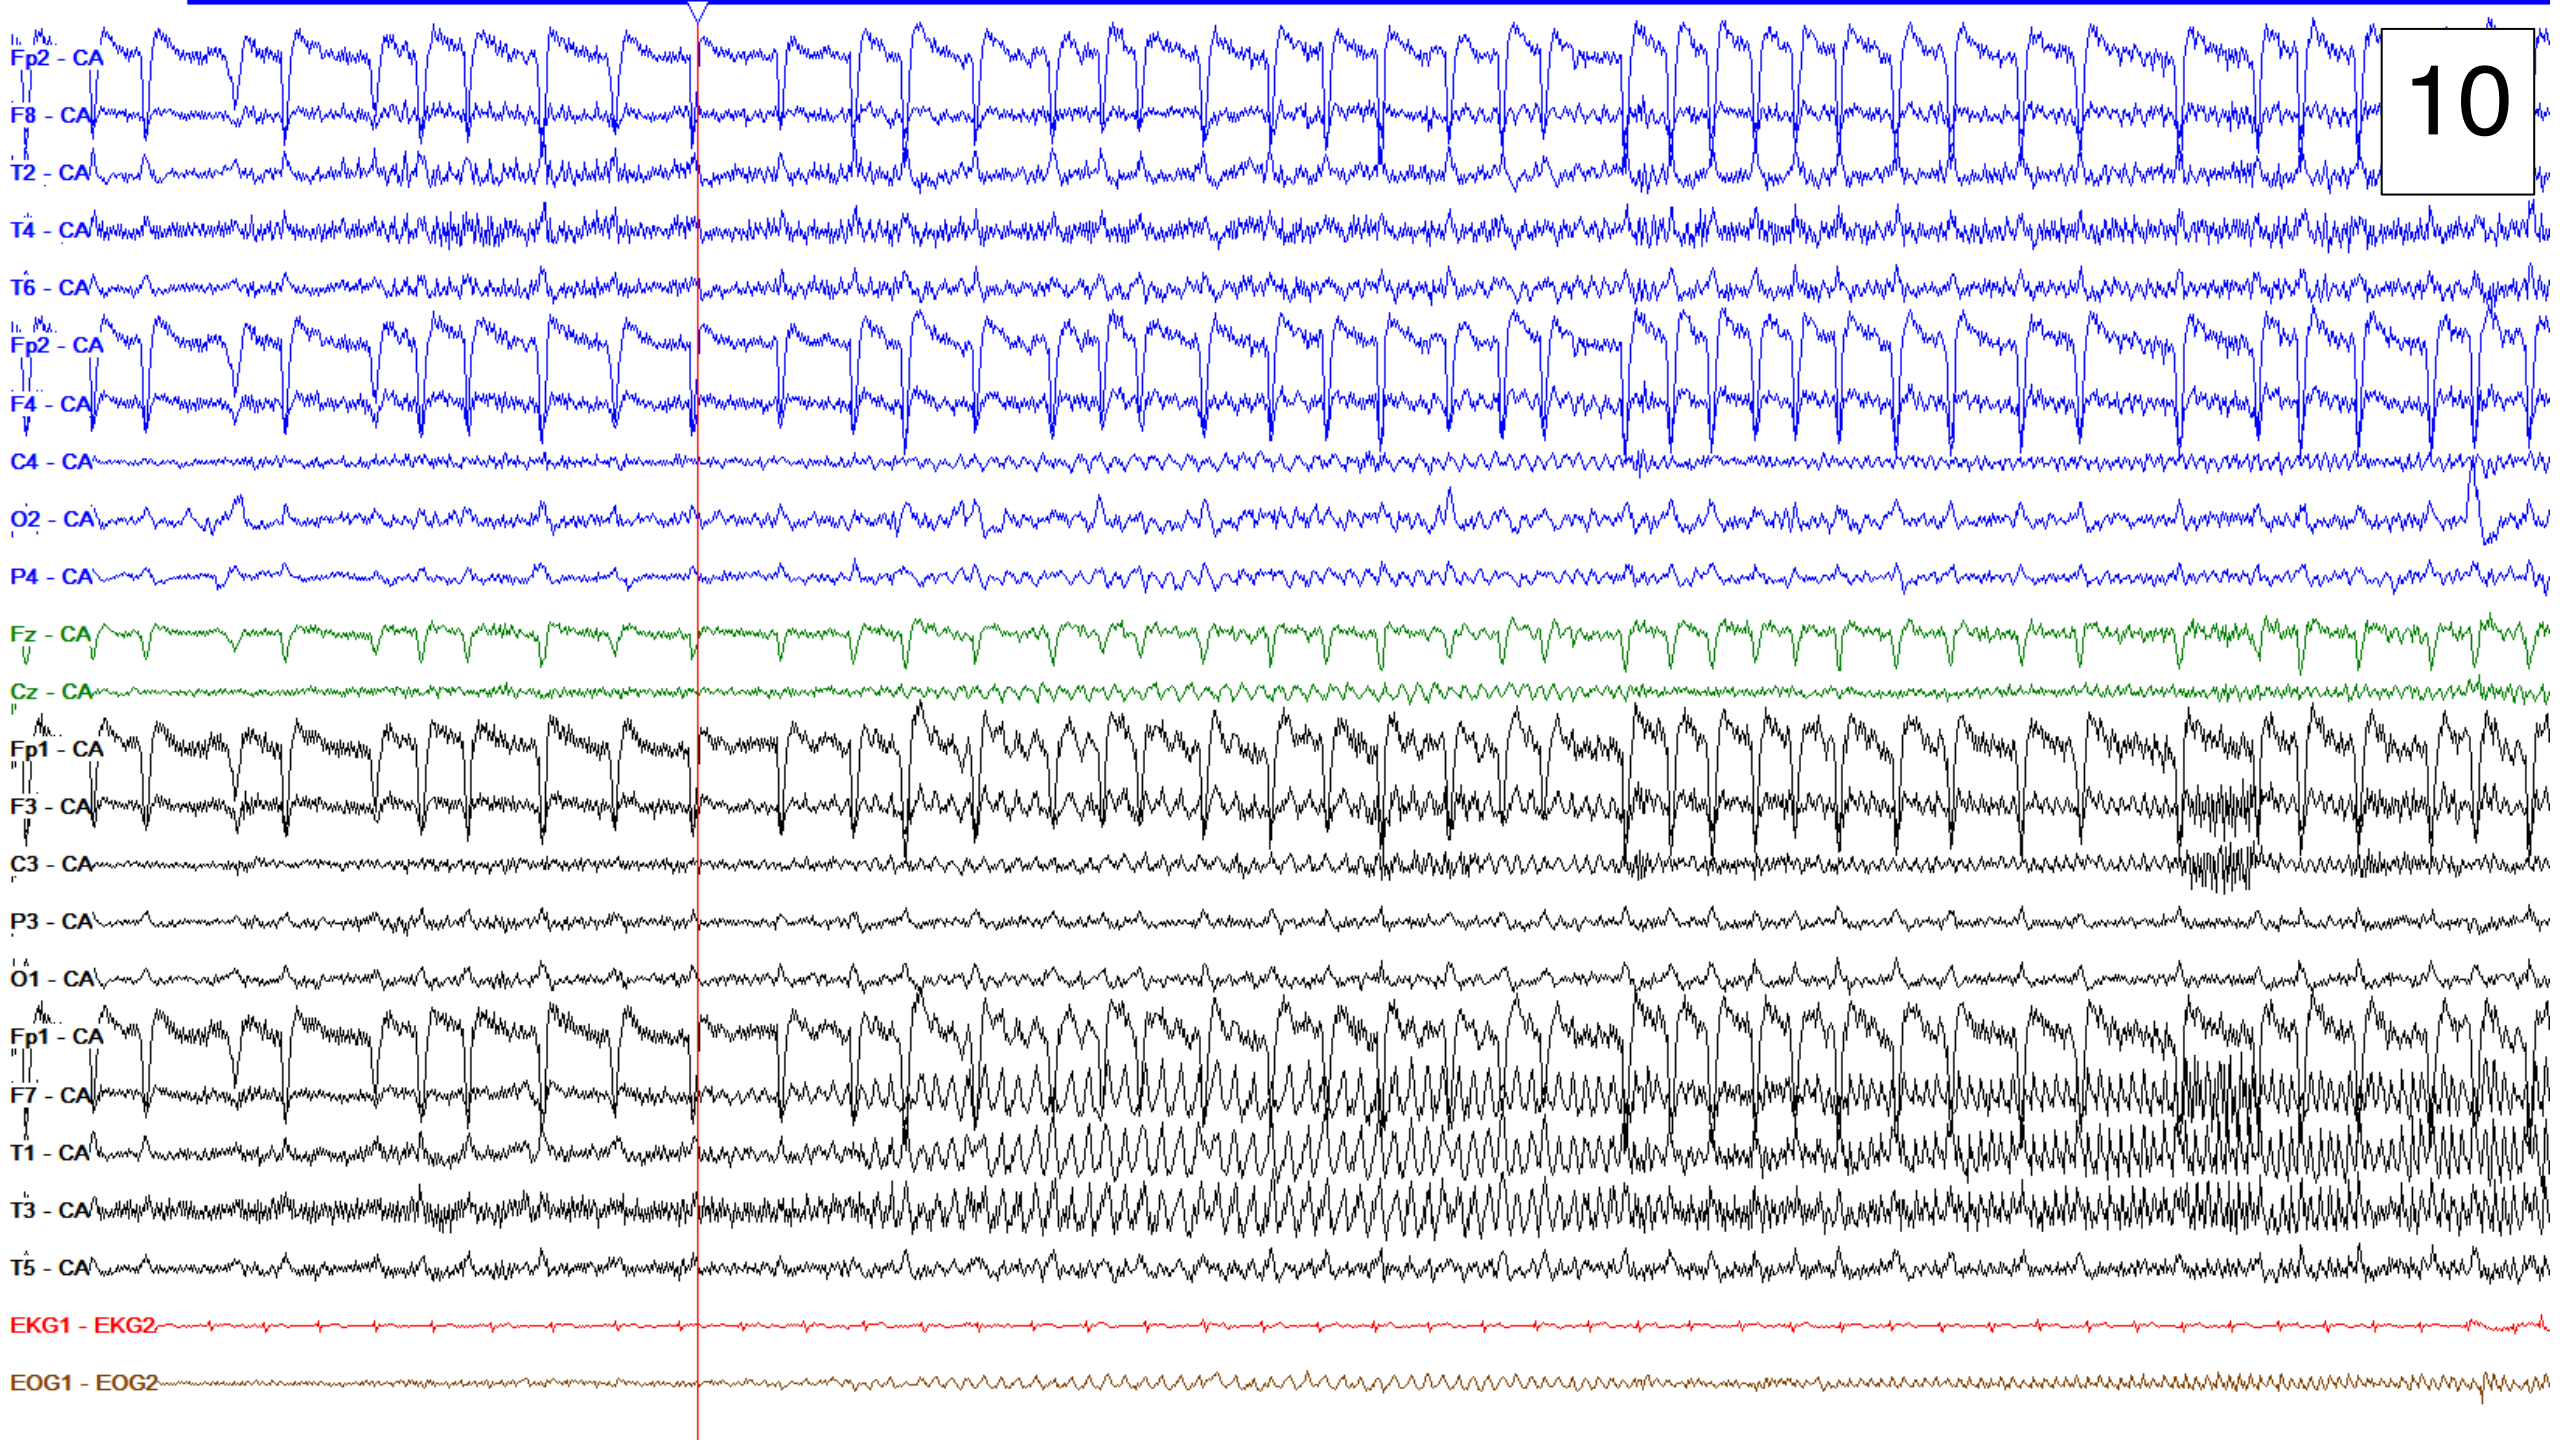

Supplement: MOESM1 [file 26513320]
